# Supplementary material for: Differential effects of milk, yogurt, and cheese on energy homeostasis and brown adipose tissue phenotype in high-fat diet-induced obese mice
Source: Royal Society of Chemistry journal article supplement (doi:10.1039/d4fo02201g), 2024-01-01
Supplement: d4fo02201g2.xlsx [file d4fo02201g2.xlsx]

## Sheet: Significant changes vs HFD-at l
Table S1- Lipid molecules differing between dairy products plus HFD vs. HFD-fed mice
Name									HFD vs Milk						HFD Vs. Yogurt						HFD Vs. Cheese
Name	Super_class_N	Main_class	Sub_class	RT (min)	m/z	Polarity	Identification Level	m/z error (ppm)	FC	log2(FC)	P-value	q-value	Significant	Trend	FC	log2(FC)	P-value	q-value	Significant	Trend	FC	log2(FC)	P-value	q-value	Significant	Trend
NAT 22:2;O2	Fatty Acyls	Fatty amides	NAT	1.09895	476.306	Pos	Tier 3	4.84537	1.2347	0.30417	0.17449	0.682897	NoSig	NA	1.266	0.34024	0.15407	0.998251	NoSig	NA	1.3925	0.47769	0.002953	0.576903	Sig	↑
NAE 22:1;O	Fatty Acyls	Fatty amides	NAE	7.24746	415.39	Pos	Tier 3	0.812873	1.1679	0.22394	0.057218	0.550873	NoSig	NA	1.2316	0.30054	0.11054	0.988503	NoSig	NA	1.3069	0.3861	0.011992	0.606664	Sig	↑
NAT 34:3;O3	Fatty Acyls	Fatty amides	NAT	1.83204	658.474	Pos	Tier 3	4.6816	1.0374	0.05294	0.58584	0.868379	NoSig	NA	2.523	1.3351	0.30082	0.998251	NoSig	NA	1.3447	0.42726	0.015041	0.609978	Sig	↑
NA 22:3;O2;N2	Fatty Acyls	Fatty amides	NA	5.07676	376.298	Pos	Tier 3	5.78945	1.1242	0.16891	0.5886	0.869011	NoSig	NA	1.0383	0.054244	0.61215	0.999325	NoSig	NA	1.1329	0.17998	0.022415	0.609978	Sig	↑
FA 32:0	Fatty Acyls	Fatty acids	Saturated FA	2.05003	496.511	Pos	Tier 3	3.67207	1.3834	0.46826	0.078472	0.60188	NoSig	NA	1.0507	0.071398	0.59081	0.999325	NoSig	NA	0.88318	-0.17923	0.033013	0.666341	Sig	↓
NAT 24:3;O4	Fatty Acyls	Fatty amides	NAT	1.0532	534.312	Pos	Tier 3	4.89964	1.3778	0.46241	0.2891	0.718603	NoSig	NA	1.3851	0.47	0.082546	0.981545	NoSig	NA	1.686	0.75361	0.03512	0.679085	Sig	↑
FA 24:1	Fatty Acyls	Fatty acids	Unsaturated FA	8.19732	365.343	Neg	Tier 3	0.0709704	1.2656	0.33981	0.053716	0.541223	NoSig	NA	1.0713	0.099337	0.38062	0.998251	NoSig	NA	0.86668	-0.20642	0.044172	0.700904	Sig	↓
NA 29:6;O2;N	Fatty Acyls	Fatty amides	NA	3.75446	451.333	Pos	Tier 3	1.57152	1.3869	0.47186	0.070552	0.581864	NoSig	NA	1.2536	0.32611	0.34209	0.998251	NoSig	NA	1.6056	0.68316	0.04792	0.700904	Sig	↑
Car 24:0	Fatty Acyls	Fatty esters	Acyl carnitines	6.60233	512.466	Pos	Tier 1	2.12696	0.96701	-0.048393	0.76448	0.932134	NoSig	NA	1.019	0.027199	0.93014	0.999325	NoSig	NA	0.78068	-0.35719	0.048689	0.700904	Sig	↓
FA 26:0;O4	Fatty Acyls	Fatty acids	Oxidized FA	3.71631	481.352	Pos	Tier 3	4.23682	1.227	0.29512	0.0017439	0.348793	Sig	↑	1.0942	0.12989	0.30108	0.998251	NoSig	NA	0.94518	-0.081346	0.20242	0.844534	NoSig	NA
NAT 34:1	Fatty Acyls	Fatty amides	NAT	4.46866	614.518	Pos	Tier 3	0.770973	1.3554	0.43871	0.023374	0.478812	Sig	↑	1.2313	0.30019	0.17241	0.998251	NoSig	NA	1.1336	0.18093	0.29418	0.880731	NoSig	NA
NAT 29:5	Fatty Acyls	Fatty amides	NAT	3.48506	553.407	Pos	Tier 3	6.10042	0.70979	-0.49453	0.0036742	0.422717	Sig	↓	0.80029	-0.3214	0.1204	0.991106	NoSig	NA	1.1009	0.13864	0.2983	0.880731	NoSig	NA
FA 22:6 (Docosahexaenoic acid or DHA, omega-3 fatty acid that is a primary structural component of the human brain, cerebral cortex, skin, and retina)	Fatty Acyls	Fatty acids	Unsaturated FA	4.46939	329.243	Pos	Tier 2	14.1535	1.3363	0.4182	0.0051856	0.439023	Sig	↑	1.1478	0.19889	0.28212	0.998251	NoSig	NA	1.046	0.064946	0.58825	0.939974	NoSig	NA
FA 24:6	Fatty Acyls	Fatty acids	Unsaturated FA	2.83177	355.264	Neg	Tier 3	0.325594	0.72653	-0.4609	0.033118	0.501346	Sig	↓	0.94741	-0.077942	0.65871	0.999325	NoSig	NA	0.97113	-0.042257	0.79286	0.963012	NoSig	NA
NAE 22:0	Fatty Acyls	Fatty amides	NAE	6.7504	366.373	Pos	Tier 3	0.417344	2.6681	1.4158	0.011585	0.466777	Sig	↑	1.5703	0.651	0.34044	0.998251	NoSig	NA	0.98183	-0.02646	0.9275	0.987625	NoSig	NA
NA 27:5;O3;N3	Fatty Acyls	Fatty amides	NA	3.39468	513.343	Pos	Tier 3	3.11204	0.85793	-0.22107	0.11589	0.669226	NoSig	NA	0.78213	-0.35452	0.01124	0.69855	Sig	↓	0.70509	-0.50412	0.00091663	0.394276	Sig	↓
Car 22:3;O2	Fatty Acyls	Fatty esters	Acyl carnitines	2.4859	510.383	Pos	Tier 3	8.54968	1.1881	0.24871	0.15259	0.682897	NoSig	NA	1.2024	0.26597	0.030713	0.841317	Sig	↑	1.2115	0.27685	0.1347	0.771007	NoSig	NA
Car 18:1;O2	Fatty Acyls	Fatty esters	Acyl carnitines	1.95081	458.348	Pos	Tier 3	1.56338	1.1723	0.22931	0.059046	0.552296	NoSig	NA	1.2907	0.36821	0.011887	0.69855	Sig	↑	1.3147	0.3947	0.16888	0.8127	NoSig	NA
Car 15:2	Fatty Acyls	Fatty esters	Acyl carnitines	2.29645	382.298	Pos	Tier 2	7.71655	1.0276	0.0393	0.76634	0.932134	NoSig	NA	1.1657	0.22114	0.046641	0.910625	Sig	↑	1.0494	0.06952	0.42061	0.892881	NoSig	NA
FAHFA 20:5_18:1	Fatty Acyls	Fatty esters	FAHFA	2.60831	581.455	Neg	Tier 1	4.76389	1.0425	0.060014	0.83008	0.950969	NoSig	NA	0.66961	-0.57861	0.031943	0.85219	Sig	↓	1.0145	0.02075	0.91719	0.986551	NoSig	NA
FAHFA 20:5_22:5	Fatty Acyls	Fatty esters	FAHFA	2.40707	629.455	Neg	Tier 1	3.90813	1.2114	0.27662	0.11159	0.669226	NoSig	NA	1.4147	0.50048	0.00065336	0.300676	Sig	↑	1.0083	0.011863	0.95027	0.990295	NoSig	NA
NAT 32:0;O	Fatty Acyls	Fatty amides	NAT	6.80414	602.482	Neg	Tier 3	0.0497109	1.3881	0.47312	3.64e-05	0.0837955	Sig	↑	1.8102	0.85618	9.3979e-05	0.216246	Sig	↑	1.3568	0.44017	0.14433	0.332103	NoSig	NA
FA 34:7;O	Fatty Acyls	Fatty acids	Oxidized FA	4.77215	511.419	Pos	Tier 3	9.22588	1.3539	0.43715	0.0010322	0.289604	Sig	↑	1.3947	0.47994	0.0017135	0.409897	Sig	↑	1.2387	0.3088	0.022524	0.609978	Sig	↑
NAT 34:0;O	Fatty Acyls	Fatty amides	NAT	9.08182	630.519	Neg	Tier 3	7.72732	1.6773	0.74616	0.032563	0.501346	Sig	↑	1.3923	0.47743	0.015968	0.782475	Sig	↑	1.7373	0.79688	0.052195	0.708047	NoSig	NA
TG 46:2	Glycerolipids	Triradylglycerols	TG	17.826	792.708	Pos	Tier 3	1.04173	3.6619	1.8726	0.37044	0.745741	NoSig	NA	2.5012	1.3226	0.18024	0.998251	NoSig	NA	1.4908	0.57609	0.00047384	0.305492	Sig	↑
TG 53:6	Glycerolipids	Triradylglycerols	TG	17.8323	882.755	Pos	Tier 3	0.146868	1.6564	0.72801	0.063854	0.565108	NoSig	NA	1.4462	0.53225	0.063483	0.981545	NoSig	NA	1.7401	0.79914	0.00053106	0.305492	Sig	↑
DGTS 3:0_24:1	Glycerolipids	Other Glycerolipids	DGTS	15.6718	640.51	Pos	Tier 2	6.91631	1.0202	0.028882	0.83029	0.950969	NoSig	NA	0.99092	-0.013165	0.90774	0.999325	NoSig	NA	0.70714	-0.49994	0.0014627	0.478982	Sig	↓
DG O-51:13	Glycerolipids	Diradylglycerols	O-DG	13.3149	777.621	Pos	Tier 3	3.93771	1.2543	0.32689	0.32295	0.728984	NoSig	NA	0.91369	-0.13022	0.1696	0.998251	NoSig	NA	0.78931	-0.34134	0.0029615	0.576903	Sig	↓
TG 94:1;O	Glycerolipids	Triradylglycerols	TG	15.4381	1488.43	Pos	Tier 3	2.30443	0.9832	-0.024437	0.81609	0.945155	NoSig	NA	0.9759	-0.035196	0.70723	0.999325	NoSig	NA	0.82398	-0.27932	0.0043638	0.576903	Sig	↓
DG 44:4;O2	Glycerolipids	Diradylglycerols	DG	9.17471	761.632	Pos	Tier 3	4.15316	0.91795	-0.12351	0.52837	0.842703	NoSig	NA	0.93442	-0.097863	0.33731	0.998251	NoSig	NA	0.83654	-0.2575	0.0054761	0.576903	Sig	↓
DG O-63:6	Glycerolipids	Diradylglycerols	O-DG	19.1236	999.912	Pos	Tier 3	3.89181	1.08	0.11102	0.35242	0.739646	NoSig	NA	0.87871	-0.18654	0.36495	0.998251	NoSig	NA	0.83285	-0.26387	0.01188	0.606664	Sig	↓
DG 11:0_22:5	Glycerolipids	Diradylglycerols	DG	6.20819	590.481	Pos	Tier 2	5.1145	0.99102	-0.01301	0.94302	0.984803	NoSig	NA	1.1228	0.16716	0.56827	0.999325	NoSig	NA	0.71323	-0.48756	0.014804	0.609978	Sig	↓
TG 14:1_18:1_18:2	Glycerolipids	Triradylglycerols	TG	17.9391	844.74	Pos	Tier 2	0.402491	1.8523	0.88934	0.10704	0.667539	NoSig	NA	1.2478	0.31933	0.054583	0.922184	NoSig	NA	1.4455	0.53158	0.016272	0.609978	Sig	↑
TG 46:6;O2	Glycerolipids	Triradylglycerols	TG	11.0742	821.594	Pos	Tier 3	4.38515	0.83677	-0.25709	0.16212	0.682897	NoSig	NA	0.8139	-0.29708	0.07587	0.981545	NoSig	NA	0.74681	-0.42118	0.016609	0.609978	Sig	↓
TG 15:2_19:0_21:1	Glycerolipids	Triradylglycerols	TG	18.4659	916.834	Pos	Tier 1	0.927104	1.3706	0.4548	0.1346	0.674684	NoSig	NA	1.1393	0.18818	0.13815	0.998251	NoSig	NA	1.1905	0.25156	0.020122	0.609978	Sig	↑
DG 40:11;O2	Glycerolipids	Diradylglycerols	DG	19.0089	691.458	Pos	Tier 3	1.96828	0.9096	-0.13669	0.32575	0.728984	NoSig	NA	0.91925	-0.12147	0.46253	0.998251	NoSig	NA	0.79961	-0.32263	0.020803	0.609978	Sig	↓
TG 94:20;O2	Glycerolipids	Triradylglycerols	TG	11.3989	1466.13	Pos	Tier 3	2.21878	0.92936	-0.10569	0.43335	0.793288	NoSig	NA	0.9549	-0.066573	0.5602	0.999325	NoSig	NA	0.88232	-0.18063	0.020872	0.609978	Sig	↓
TG 50:5	Glycerolipids	Triradylglycerols	TG	17.4819	847.679	Pos	Tier 3	1.00886	2.1674	1.116	0.23633	0.693616	NoSig	NA	1.0477	0.067166	0.37024	0.998251	NoSig	NA	1.3148	0.39483	0.023191	0.609978	Sig	↑
DG 34:3	Glycerolipids	Diradylglycerols	DG	10.9166	608.526	Pos	Tier 3	1.95091	1.4516	0.53765	0.05363	0.541223	NoSig	NA	1.1085	0.1486	0.30922	0.998251	NoSig	NA	1.3097	0.38928	0.023323	0.609978	Sig	↑
DG 40:7	Glycerolipids	Diradylglycerols	DG	11.6339	684.558	Pos	Tier 3	3.48374	1.0972	0.13383	0.65619	0.902545	NoSig	NA	1.2017	0.26505	0.064777	0.981545	NoSig	NA	1.5303	0.61381	0.02602	0.610939	Sig	↑
LDGTS 16:1	Glycerolipids	Other Glycerolipids	LDGTS	6.06256	472.364	Pos	Tier 1	0.825636	0.99603	-0.0057357	0.96382	0.989738	NoSig	NA	1.0165	0.023552	0.85554	0.999325	NoSig	NA	0.82665	-0.27465	0.028219	0.624075	Sig	↓
TG 63:4;O	Glycerolipids	Triradylglycerols	TG	19.011	1042.94	Pos	Tier 3	4.67554	0.85782	-0.22125	0.14792	0.682092	NoSig	NA	0.96011	-0.058728	0.67327	0.999325	NoSig	NA	0.76627	-0.38408	0.034941	0.679085	Sig	↓
TG 38:5;O	Glycerolipids	Triradylglycerols	TG	13.641	690.531	Pos	Tier 3	0.463943	1.031	0.044022	0.76113	0.932076	NoSig	NA	0.96194	-0.055986	0.53698	0.999325	NoSig	NA	0.84698	-0.2396	0.035949	0.689322	Sig	↓
DG 34:1	Glycerolipids	Diradylglycerols	DG	13.79	595.531	Pos	Tier 3	1.6467	1.8334	0.87455	0.17289	0.682897	NoSig	NA	0.93928	-0.090365	0.33234	0.998251	NoSig	NA	1.1478	0.19885	0.037327	0.70057	Sig	↑
MG 18:2	Glycerolipids	Monoradylglycerols	MG	2.19635	355.285	Pos	Tier 3	2.38231	1.1383	0.18687	0.50445	0.834092	NoSig	NA	1.1695	0.2259	0.33919	0.998251	NoSig	NA	1.3543	0.43759	0.037449	0.70057	Sig	↑
TG 12:0_21:0_22:4	Glycerolipids	Triradylglycerols	TG	17.9435	914.819	Pos	Tier 1	1.96761	1.7884	0.83865	0.08261	0.613834	NoSig	NA	1.2082	0.27286	0.10927	0.988503	NoSig	NA	1.3982	0.48361	0.038755	0.700904	Sig	↑
DG 29:1	Glycerolipids	Diradylglycerols	DG	4.18242	525.456	Pos	Tier 3	8.95988	1.0356	0.050528	0.7499	0.931203	NoSig	NA	0.99348	-0.0094382	0.92755	0.999325	NoSig	NA	0.87544	-0.19191	0.039161	0.700904	Sig	↓
DG O-34:1	Glycerolipids	Diradylglycerols	O-DG	14.9207	603.533	Pos	Tier 3	1.98434	0.65073	-0.61988	0.099657	0.651305	NoSig	NA	0.80048	-0.32107	0.38736	0.998251	NoSig	NA	0.57381	-0.80135	0.043532	0.700904	Sig	↓
TG 16:0_16:1_18:2	Glycerolipids	Triradylglycerols	TG	18.465	846.755	Pos	Tier 2	0.377913	1.732	0.79242	0.14231	0.68078	NoSig	NA	1.2351	0.30468	0.090679	0.981545	NoSig	NA	1.3726	0.45695	0.044677	0.700904	Sig	↑
DG 59:10	Glycerolipids	Diradylglycerols	DG	18.1188	927.784	Pos	Tier 3	4.0452	1.9201	0.94117	0.16931	0.682897	NoSig	NA	1.2222	0.28943	0.10916	0.988503	NoSig	NA	1.5818	0.66153	0.044723	0.700904	Sig	↑
TG 56:10	Glycerolipids	Triradylglycerols	TG	17.2848	916.74	Pos	Tier 3	1.66573	1.3576	0.44103	0.36709	0.745741	NoSig	NA	1.1452	0.19558	0.37087	0.998251	NoSig	NA	1.284	0.3607	0.046186	0.700904	Sig	↑
TG 49:3	Glycerolipids	Triradylglycerols	TG	18.1718	832.74	Pos	Tier 3	1.38332	1.994	0.99566	0.085114	0.618054	NoSig	NA	1.3186	0.39902	0.095495	0.985354	NoSig	NA	1.3819	0.4667	0.046503	0.700904	Sig	↑
TG 44:6;O2	Glycerolipids	Triradylglycerols	TG	8.43909	793.56	Pos	Tier 3	1.36522	2.4634	1.3007	0.050951	0.54064	NoSig	NA	1.3724	0.4567	0.15966	0.998251	NoSig	NA	1.6337	0.70813	0.046648	0.700904	Sig	↑
TG 50:0	Glycerolipids	Triradylglycerols	TG	19.9402	852.806	Pos	Tier 3	5.02772	1.3978	0.4832	0.15534	0.682897	NoSig	NA	0.82258	-0.28178	0.073456	0.981545	NoSig	NA	0.85386	-0.22793	0.048501	0.700904	Sig	↓
DG O-38:1	Glycerolipids	Diradylglycerols	O-DG	16.7987	659.596	Pos	Tier 3	1.66822	0.54846	-0.86653	0.015381	0.466777	Sig	↓	0.84874	-0.23661	0.44675	0.998251	NoSig	NA	0.56707	-0.81841	0.0083062	0.606664	Sig	↓
TG 17:1_18:1_18:2	Glycerolipids	Triradylglycerols	TG	18.7893	886.788	Pos	Tier 2	1.73661	1.6026	0.68037	0.036404	0.50298	Sig	↑	1.3015	0.38019	0.10907	0.988503	NoSig	NA	1.6699	0.73979	0.0095662	0.606664	Sig	↑
DG O-36:2	Glycerolipids	Diradylglycerols	O-DG	15.1418	629.549	Pos	Tier 3	0.975997	0.54899	-0.86515	0.039281	0.511212	Sig	↓	0.91722	-0.12465	0.7308	0.999325	NoSig	NA	0.48743	-1.0367	0.012089	0.606664	Sig	↓
DG O-38:2	Glycerolipids	Diradylglycerols	O-DG	16.16	657.58	Pos	Tier 3	1.1535	0.64627	-0.6298	0.019871	0.466777	Sig	↓	0.99902	-0.0014152	0.99593	0.999479	NoSig	NA	0.67428	-0.56859	0.012971	0.609978	Sig	↓
DG 53:13	Glycerolipids	Diradylglycerols	DG	13.9605	835.627	Neg	Tier 3	3.32403	0.88578	-0.17498	0.04321	0.531117	Sig	↓	0.83344	-0.26285	0.053976	0.919991	NoSig	NA	0.74798	-0.41894	0.014364	0.609978	Sig	↓
DG 55:6;O2	Glycerolipids	Diradylglycerols	DG	17.5517	911.772	Pos	Tier 3	2.82071	1.4289	0.51494	0.01635	0.466777	Sig	↑	1.0356	0.050403	0.64243	0.999325	NoSig	NA	1.269	0.34369	0.025529	0.609978	Sig	↑
DG O-44:0;O	Glycerolipids	Diradylglycerols	O-DG	19.0137	761.702	Pos	Tier 3	3.05532	0.74749	-0.41988	0.010445	0.466777	Sig	↓	0.91727	-0.12458	0.15702	0.998251	NoSig	NA	0.82651	-0.2749	0.025676	0.609978	Sig	↓
TG 84:7;O3	Glycerolipids	Triradylglycerols	TG	19.1304	1368.16	Pos	Tier 3	0.235657	0.67324	-0.5708	0.048794	0.537201	Sig	↓	0.8697	-0.20141	0.10975	0.988503	NoSig	NA	0.72436	-0.46521	0.033513	0.667826	Sig	↓
DG dO-40:0	Glycerolipids	Diradylglycerols	DG	12.6691	637.56	Pos	Tier 3	7.57046	1.4387	0.52477	0.028335	0.485624	Sig	↑	1.1817	0.24083	0.070754	0.981545	NoSig	NA	1.414	0.49975	0.044331	0.700904	Sig	↑
DG 38:2;O2	Glycerolipids	Diradylglycerols	DG	19.5946	698.595	Pos	Tier 3	3.35311	0.63528	-0.65454	0.02685	0.485624	Sig	↓	1.0083	0.011916	0.96761	0.999325	NoSig	NA	0.72027	-0.47338	0.047344	0.700904	Sig	↓
TG 58:3	Glycerolipids	Triradylglycerols	TG	19.2534	958.883	Pos	Tier 3	3.22794	1.4653	0.55121	0.046842	0.533435	Sig	↑	1.1102	0.15085	0.35394	0.998251	NoSig	NA	1.2943	0.37213	0.049152	0.700904	Sig	↑
TG 15:1_18:1_18:2	Glycerolipids	Triradylglycerols	TG	18.2627	858.756	Pos	Tier 2	1.21106	1.5861	0.66551	0.001819	0.348793	Sig	↑	1.249	0.32075	0.165	0.998251	NoSig	NA	1.4394	0.52551	0.050565	0.700904	NoSig	NA
DG 39:1	Glycerolipids	Diradylglycerols	DG	19.2254	682.636	Pos	Tier 3	2.10953	0.79289	-0.33481	0.038156	0.50626	Sig	↓	0.97179	-0.041287	0.71493	0.999325	NoSig	NA	0.82483	-0.27783	0.052315	0.708047	NoSig	NA
TG 16:2_18:1_18:2	Glycerolipids	Triradylglycerols	TG	18.0154	870.755	Pos	Tier 2	0.356013	1.4909	0.57617	0.02872	0.485624	Sig	↑	1.2416	0.31223	0.15566	0.998251	NoSig	NA	1.4738	0.55959	0.065902	0.753799	NoSig	NA
TG 17:2_18:1_18:2	Glycerolipids	Triradylglycerols	TG	18.3107	884.771	Pos	Tier 1	0.406885	1.8282	0.87039	0.010184	0.466777	Sig	↑	1.3972	0.4825	0.10323	0.988503	NoSig	NA	1.5985	0.67673	0.0675	0.753799	NoSig	NA
TG 81:5;O	Glycerolipids	Triradylglycerols	TG	19.2711	1293.21	Pos	Tier 3	1.7974	0.80296	-0.31659	0.00062557	0.239906	Sig	↓	0.948	-0.077044	0.5153	0.999325	NoSig	NA	0.91735	-0.12446	0.07146	0.763843	NoSig	NA
DG O-43:0;O	Glycerolipids	Diradylglycerols	O-DG	19.2414	725.702	Pos	Tier 3	0.205604	0.7215	-0.47093	0.016918	0.466777	Sig	↓	0.93914	-0.090595	0.48774	0.998251	NoSig	NA	0.83159	-0.26606	0.079702	0.763843	NoSig	NA
TG 13:0_22:0_22:5	Glycerolipids	Triradylglycerols	TG	18.008	940.834	Pos	Tier 1	0.712135	1.4485	0.53456	0.024509	0.485124	Sig	↑	1.2244	0.29209	0.18667	0.998251	NoSig	NA	1.3925	0.47771	0.09484	0.763843	NoSig	NA
TG 14:0_22:0_22:5	Glycerolipids	Triradylglycerols	TG	18.016	954.849	Pos	Tier 1	0.29324	1.4287	0.51475	0.043708	0.531117	Sig	↑	1.215	0.28094	0.2092	0.998251	NoSig	NA	1.3878	0.47285	0.10007	0.763843	NoSig	NA
DG 38:4;O2	Glycerolipids	Diradylglycerols	DG	9.06452	675.522	Neg	Tier 3	2.49952	1.5536	0.63564	0.017352	0.466777	Sig	↑	1.3247	0.40564	0.107	0.988503	NoSig	NA	1.4721	0.55787	0.10506	0.763849	NoSig	NA
TG 51:3	Glycerolipids	Triradylglycerols	TG	18.7883	865.727	Pos	Tier 3	1.91281	1.7697	0.82354	0.020493	0.466777	Sig	↑	1.2415	0.31204	0.1345	0.998251	NoSig	NA	1.2893	0.36657	0.10949	0.763849	NoSig	NA
TG 17:2_18:0_19:3	Glycerolipids	Triradylglycerols	TG	18.592	898.787	Pos	Tier 2	0.734324	2.3592	1.2383	0.037941	0.50626	Sig	↑	1.3829	0.46766	0.10259	0.988503	NoSig	NA	1.7123	0.77595	0.11668	0.763849	NoSig	NA
TG 16:0_17:1_18:2	Glycerolipids	Triradylglycerols	TG	18.7496	860.772	Pos	Tier 2	1.4638	1.5041	0.5889	0.031954	0.501346	Sig	↑	1.2189	0.2856	0.2248	0.998251	NoSig	NA	1.3012	0.37985	0.12969	0.764626	NoSig	NA
TG 79:4;O	Glycerolipids	Triradylglycerols	TG	19.2283	1267.19	Pos	Tier 3	1.85085	0.79769	-0.32609	0.016829	0.466777	Sig	↓	1.0017	0.0023871	0.98591	0.999325	NoSig	NA	0.83929	-0.25276	0.13121	0.770189	NoSig	NA
DG 37:4	Glycerolipids	Diradylglycerols	DG	9.08539	653.514	Pos	Tier 3	4.15051	1.5677	0.6486	0.013032	0.466777	Sig	↑	1.3914	0.47655	0.072472	0.981545	NoSig	NA	1.531	0.61443	0.1492	0.787406	NoSig	NA
TG 16:0_16:1_20:3	Glycerolipids	Triradylglycerols	TG	18.556	872.771	Pos	Tier 2	0.584346	1.625	0.70046	0.038098	0.50626	Sig	↑	1.3085	0.38792	0.071376	0.981545	NoSig	NA	1.4544	0.54039	0.15641	0.796849	NoSig	NA
TG 83:7;O3	Glycerolipids	Triradylglycerols	TG	19.6118	1349.2	Pos	Tier 3	3.67498	0.63435	-0.65665	0.03018	0.485624	Sig	↓	0.96733	-0.047919	0.84972	0.999325	NoSig	NA	0.79937	-0.32306	0.16509	0.811693	NoSig	NA
TG 15:2_18:0_21:2	Glycerolipids	Triradylglycerols	TG	19.0782	900.804	Pos	Tier 2	1.99822	1.7293	0.79017	0.018537	0.466777	Sig	↑	1.2442	0.31517	0.24129	0.998251	NoSig	NA	1.4517	0.53778	0.16933	0.8127	NoSig	NA
TG 16:0_22:0_22:5	Glycerolipids	Triradylglycerols	TG	18.5975	982.881	Pos	Tier 1	1.01742	1.7818	0.83338	0.019766	0.466777	Sig	↑	1.2514	0.32354	0.17908	0.998251	NoSig	NA	1.3812	0.46592	0.17727	0.8127	NoSig	NA
DG 36:2	Glycerolipids	Diradylglycerols	DG	13.9004	643.528	Pos	Tier 3	1.46163	1.3462	0.42889	0.015598	0.466777	Sig	↑	1.0965	0.13289	0.26364	0.998251	NoSig	NA	1.1418	0.19134	0.17801	0.8127	NoSig	NA
TG 15:0_22:0_22:5	Glycerolipids	Triradylglycerols	TG	18.5948	968.866	Pos	Tier 1	1.03214	1.8085	0.85478	0.025086	0.485124	Sig	↑	1.2552	0.32797	0.19539	0.998251	NoSig	NA	1.3997	0.48515	0.17946	0.812869	NoSig	NA
DG 42:7;O	Glycerolipids	Diradylglycerols	DG	13.8966	709.544	Neg	Tier 3	4.37125	1.4007	0.48611	0.017108	0.466777	Sig	↑	1.1951	0.25707	0.091057	0.981545	NoSig	NA	1.161	0.21534	0.18578	0.825251	NoSig	NA
TG 59:3	Glycerolipids	Triradylglycerols	TG	19.2597	972.896	Pos	Tier 3	1.10697	1.2766	0.35227	0.030162	0.485624	Sig	↑	1.1979	0.26052	0.12304	0.991106	NoSig	NA	1.269	0.34371	0.20182	0.844534	NoSig	NA
TG 15:0_22:0_22:4	Glycerolipids	Triradylglycerols	TG	19.0546	970.882	Pos	Tier 1	1.79219	1.4845	0.57002	0.021334	0.466777	Sig	↑	1.2044	0.26832	0.15701	0.998251	NoSig	NA	1.3263	0.40735	0.20688	0.850055	NoSig	NA
TG 16:0_22:0_22:4	Glycerolipids	Triradylglycerols	TG	19.0617	984.898	Pos	Tier 1	1.93929	1.4689	0.55471	0.019807	0.466777	Sig	↑	1.2027	0.26624	0.19614	0.998251	NoSig	NA	1.3052	0.38423	0.21469	0.855677	NoSig	NA
DG 38:5	Glycerolipids	Diradylglycerols	DG	12.1786	665.513	Pos	Tier 3	2.361	1.3143	0.39435	0.02582	0.485624	Sig	↑	1.1426	0.19233	0.12464	0.991106	NoSig	NA	1.1395	0.18835	0.22154	0.855677	NoSig	NA
DG 47:7	Glycerolipids	Diradylglycerols	DG	16.019	763.627	Neg	Tier 3	2.83927	1.4004	0.48585	0.013782	0.466777	Sig	↑	1.0842	0.11661	0.29656	0.998251	NoSig	NA	1.1442	0.19438	0.22216	0.855677	NoSig	NA
DG O-61:4	Glycerolipids	Diradylglycerols	O-DG	19.5315	975.91	Pos	Tier 3	2.19536	1.511	0.59551	0.020372	0.466777	Sig	↑	1.1697	0.22615	0.2884	0.998251	NoSig	NA	1.2392	0.30945	0.2253	0.855677	NoSig	NA
TG 80:2;O	Glycerolipids	Triradylglycerols	TG	19.2725	1290.19	Pos	Tier 3	3.65923	0.81816	-0.28955	0.036933	0.50298	Sig	↓	0.96226	-0.055504	0.66048	0.999325	NoSig	NA	0.89688	-0.15702	0.22954	0.855726	NoSig	NA
DG O-61:5	Glycerolipids	Diradylglycerols	O-DG	19.0576	973.893	Pos	Tier 3	1.20096	1.4091	0.49479	0.029663	0.485624	Sig	↑	1.1574	0.21085	0.29499	0.998251	NoSig	NA	1.2543	0.32682	0.24936	0.866676	NoSig	NA
TG 44:6;O3	Glycerolipids	Triradylglycerols	TG	11.8419	804.602	Pos	Tier 3	4.63024	0.79843	-0.32475	0.036942	0.50298	Sig	↓	0.8428	-0.24673	0.057083	0.94495	NoSig	NA	0.87097	-0.1993	0.25174	0.866676	NoSig	NA
TG 18:1_18:2_20:2	Glycerolipids	Triradylglycerols	TG	19.126	926.819	Pos	Tier 2	1.58607	1.4645	0.55044	0.022217	0.472493	Sig	↑	1.1277	0.17339	0.43225	0.998251	NoSig	NA	1.3081	0.38744	0.25338	0.867268	NoSig	NA
TG 14:0_22:0_22:3	Glycerolipids	Triradylglycerols	TG	19.0258	958.882	Pos	Tier 1	1.49132	1.2724	0.34755	0.023958	0.483573	Sig	↑	1.1424	0.19204	0.21166	0.998251	NoSig	NA	1.1824	0.24174	0.25511	0.869642	NoSig	NA
TG 13:0_22:0_22:3	Glycerolipids	Triradylglycerols	TG	19.0272	944.866	Pos	Tier 1	1.54519	1.2926	0.37028	0.019693	0.466777	Sig	↑	1.1584	0.21215	0.16953	0.998251	NoSig	NA	1.1938	0.25554	0.26179	0.879863	NoSig	NA
TG 16:0_18:1_22:5	Glycerolipids	Triradylglycerols	TG	18.8956	924.803	Pos	Tier 2	1.02725	1.3128	0.3927	0.014096	0.466777	Sig	↑	1.1599	0.21399	0.092087	0.981545	NoSig	NA	1.2284	0.29682	0.27417	0.880731	NoSig	NA
TG 16:0_18:1_18:2	Glycerolipids	Triradylglycerols	TG	19.0381	874.788	Pos	Tier 2	1.46321	1.4209	0.50686	0.018672	0.466777	Sig	↑	1.1218	0.16582	0.40011	0.998251	NoSig	NA	1.2204	0.28741	0.28507	0.880731	NoSig	NA
DG O-41:0;O	Glycerolipids	Diradylglycerols	O-DG	19.2378	697.671	Pos	Tier 3	0.6445	0.77002	-0.37703	0.018252	0.466777	Sig	↓	1.001	0.0014531	0.99239	0.999325	NoSig	NA	0.89933	-0.15307	0.28918	0.880731	NoSig	NA
DG 47:2;O2	Glycerolipids	Diradylglycerols	DG	14.7865	829.689	Pos	Tier 3	0.120243	1.3138	0.39371	0.02923	0.485624	Sig	↑	1.1065	0.14601	0.39698	0.998251	NoSig	NA	1.1193	0.16261	0.29344	0.880731	NoSig	NA
TG 18:0_18:1_18:3	Glycerolipids	Triradylglycerols	TG	19.1499	905.76	Pos	Tier 2	2.82636	1.4875	0.57293	0.027142	0.485624	Sig	↑	1.0803	0.1115	0.59622	0.999325	NoSig	NA	1.1838	0.24338	0.30917	0.880731	NoSig	NA
DG O-57:6	Glycerolipids	Diradylglycerols	O-DG	19.029	915.814	Pos	Tier 3	0.259849	1.4247	0.51065	0.02134	0.466777	Sig	↑	1.2099	0.2749	0.13008	0.991106	NoSig	NA	1.1841	0.24383	0.32867	0.880731	NoSig	NA
DG O-59:7	Glycerolipids	Diradylglycerols	O-DG	19.0889	941.831	Pos	Tier 3	1.1558	1.5304	0.61389	0.022793	0.472493	Sig	↑	1.1876	0.24804	0.34454	0.998251	NoSig	NA	1.2569	0.32988	0.33922	0.880731	NoSig	NA
TG 16:0_18:2_20:1	Glycerolipids	Triradylglycerols	TG	19.5635	907.775	Pos	Tier 2	2.65485	1.3634	0.44726	0.029785	0.485624	Sig	↑	1.0907	0.12529	0.47754	0.998251	NoSig	NA	1.1347	0.18225	0.35822	0.88353	NoSig	NA
TG O-92:2	Glycerolipids	Triradylglycerols	O-TAG	18.0789	1423.45	Pos	Tier 3	2.98274	1.1611	0.21551	0.033893	0.50298	Sig	↑	1.1304	0.17682	0.15484	0.998251	NoSig	NA	1.0891	0.12308	0.35953	0.884004	NoSig	NA
DG O-63:7	Glycerolipids	Diradylglycerols	O-DG	18.8827	997.893	Pos	Tier 3	0.80213	1.2203	0.28729	0.045908	0.531117	Sig	↑	1.0849	0.11761	0.43557	0.998251	NoSig	NA	1.1128	0.15414	0.37459	0.891249	NoSig	NA
DG 57:5;O2	Glycerolipids	Diradylglycerols	DG	18.5933	941.822	Pos	Tier 3	5.24971	1.4476	0.53363	0.029458	0.485624	Sig	↑	1.1043	0.14317	0.22186	0.998251	NoSig	NA	1.1292	0.1753	0.40706	0.892805	NoSig	NA
DG 55:3;O2	Glycerolipids	Diradylglycerols	DG	19.0287	917.822	Pos	Tier 3	5.17989	1.3961	0.4814	0.021503	0.466777	Sig	↑	1.1828	0.24217	0.20609	0.998251	NoSig	NA	1.1486	0.19983	0.42434	0.892881	NoSig	NA
TG 95:2;O	Glycerolipids	Triradylglycerols	TG	18.3758	1495.47	Pos	Tier 3	1.75439	1.1333	0.18057	0.028088	0.485624	Sig	↑	1.1434	0.19334	0.10961	0.988503	NoSig	NA	1.0505	0.071059	0.49982	0.917847	NoSig	NA
TG 18:0_18:1_22:4	Glycerolipids	Triradylglycerols	TG	19.703	954.853	Pos	Tier 1	3.87496	1.3671	0.45108	0.024402	0.485124	Sig	↑	1.1453	0.19574	0.25788	0.998251	NoSig	NA	1.1389	0.1876	0.53773	0.924329	NoSig	NA
TG 80:5;O3	Glycerolipids	Triradylglycerols	TG	19.6103	1311.18	Pos	Tier 3	3.41956	0.77758	-0.36294	0.0026277	0.422717	Sig	↓	0.9248	-0.11279	0.52595	0.999325	NoSig	NA	0.97656	-0.034222	0.61743	0.943665	NoSig	NA
TG 15:1_22:2_22:2	Glycerolipids	Triradylglycerols	TG	18.8712	968.866	Pos	Tier 1	1.53788	1.3316	0.41314	0.045527	0.531117	Sig	↑	1.0706	0.098366	0.30384	0.998251	NoSig	NA	1.0532	0.07482	0.71896	0.963012	NoSig	NA
TG 60:5	Glycerolipids	Triradylglycerols	TG	18.8718	982.882	Pos	Tier 3	1.94538	1.3185	0.39893	0.045139	0.531117	Sig	↑	1.0761	0.10587	0.21888	0.998251	NoSig	NA	1.0411	0.058086	0.7736	0.963012	NoSig	NA
DG 39:2;O2	Glycerolipids	Diradylglycerols	DG	8.97002	717.565	Pos	Tier 3	1.21945	1.3764	0.46092	0.041262	0.52167	Sig	↑	0.93526	-0.096566	0.37588	0.998251	NoSig	NA	0.974	-0.038005	0.77423	0.963012	NoSig	NA
DG O-20:1	Glycerolipids	Diradylglycerols	O-DG	14.1392	385.333	Pos	Tier 3	5.81277	0.47922	-1.0612	0.0091573	0.458064	Sig	↓	0.75778	-0.40016	0.29663	0.998251	NoSig	NA	0.94831	-0.07657	0.7869	0.963012	NoSig	NA
DG 59:12	Glycerolipids	Diradylglycerols	DG	19.5992	923.752	Pos	Tier 3	3.32595	1.2908	0.36829	0.042174	0.527404	Sig	↑	1.0525	0.073806	0.63124	0.999325	NoSig	NA	0.9988	-0.0017272	0.99176	0.998224	NoSig	NA
TG 54:3	Glycerolipids	Triradylglycerols	TG	17.8542	902.818	Pos	Tier 3	1.54501	2.1584	1.1099	0.15067	0.682897	NoSig	NA	1.2882	0.36534	0.001258	0.361832	Sig	↑	1.4599	0.54588	0.0050365	0.576903	Sig	↑
DG 53:3;O2	Glycerolipids	Diradylglycerols	DG	18.4627	889.79	Pos	Tier 3	5.46703	1.352	0.43508	0.10821	0.669226	NoSig	NA	1.147	0.19781	0.016144	0.782475	Sig	↑	1.1572	0.21061	0.0058376	0.584014	Sig	↑
TG 52:1	Glycerolipids	Triradylglycerols	TG	18.3524	878.818	Pos	Tier 3	1.01884	3.1028	1.6336	0.20951	0.683377	NoSig	NA	1.4059	0.49152	0.00043913	0.263511	Sig	↑	1.2855	0.3623	0.0062832	0.588932	Sig	↑
TG 56:4	Glycerolipids	Triradylglycerols	TG	17.9504	928.834	Pos	Tier 3	1.27031	2.1062	1.0747	0.051574	0.541223	NoSig	NA	1.4535	0.53953	0.0010493	0.361832	Sig	↑	1.6796	0.74809	0.0069687	0.593888	Sig	↑
DG 51:7;O	Glycerolipids	Diradylglycerols	DG	14.5889	835.683	Neg	Tier 3	0.819897	0.8694	-0.2019	0.14591	0.682092	NoSig	NA	0.81183	-0.30076	0.0053126	0.630347	Sig	↓	0.77907	-0.36018	0.0085278	0.606664	Sig	↓
TG 53:3	Glycerolipids	Triradylglycerols	TG	17.8524	888.802	Pos	Tier 3	1.17942	2.2963	1.1993	0.15417	0.682897	NoSig	NA	1.3354	0.41727	0.0023158	0.409897	Sig	↑	1.5413	0.62416	0.008548	0.606664	Sig	↑
TG 14:1_16:0_18:2	Glycerolipids	Triradylglycerols	TG	17.8496	818.725	Pos	Tier 2	1.85655	2.5494	1.3502	0.10105	0.651305	NoSig	NA	1.3184	0.39884	0.0047291	0.630347	Sig	↑	1.4885	0.57383	0.0099401	0.606664	Sig	↑
DG O-58:13	Glycerolipids	Diradylglycerols	O-DG	17.1648	893.743	Pos	Tier 3	4.94435	2.0528	1.0376	0.23473	0.693616	NoSig	NA	1.5103	0.59485	0.023293	0.798794	Sig	↑	1.5574	0.63917	0.011109	0.606664	Sig	↑
TG 55:5	Glycerolipids	Triradylglycerols	TG	17.4609	912.802	Pos	Tier 3	0.879557	2.5435	1.3468	0.06842	0.581864	NoSig	NA	1.3317	0.4133	0.024303	0.798794	Sig	↑	1.5395	0.62245	0.017576	0.609978	Sig	↑
TG 14:0_18:2_18:3	Glycerolipids	Triradylglycerols	TG	17.4434	842.725	Pos	Tier 2	1.87487	2.5434	1.3467	0.11189	0.669226	NoSig	NA	1.3086	0.38804	0.026954	0.809894	Sig	↑	1.4331	0.5191	0.027388	0.623958	Sig	↑
MG O-16:0	Glycerolipids	Monoradylglycerols	O-MG	3.59436	339.288	Pos	Tier 3	2.01392	1.1744	0.23198	0.54382	0.849511	NoSig	NA	0.66515	-0.58824	0.020542	0.798794	Sig	↓	0.70608	-0.5021	0.029193	0.627054	Sig	↓
TG 18:2_18:3_20:5	Glycerolipids	Triradylglycerols	TG	16.959	916.74	Pos	Tier 1	0.414513	2.3998	1.2629	0.19321	0.682897	NoSig	NA	1.5861	0.66546	0.00045808	0.263511	Sig	↑	1.8403	0.87992	0.030634	0.629365	Sig	↑
TG 48:4	Glycerolipids	Triradylglycerols	TG	17.2841	816.708	Pos	Tier 3	0.709926	3.1973	1.6768	0.14521	0.682092	NoSig	NA	1.3739	0.45832	0.040258	0.910625	Sig	↑	1.4792	0.56485	0.049884	0.700904	Sig	↑
TG 57:6	Glycerolipids	Triradylglycerols	TG	17.5147	938.818	Pos	Tier 3	1.15879	1.5478	0.63018	0.058081	0.551414	NoSig	NA	1.4271	0.51304	0.037126	0.889864	Sig	↑	1.5516	0.6338	0.061127	0.738287	NoSig	NA
TG 56:5	Glycerolipids	Triradylglycerols	TG	17.4644	926.817	Pos	Tier 3	0.227777	1.9936	0.99537	0.13192	0.674684	NoSig	NA	1.2197	0.28647	0.031259	0.8462	Sig	↑	1.3778	0.46237	0.066207	0.753799	NoSig	NA
TG 16:2_18:2_20:3	Glycerolipids	Triradylglycerols	TG	17.6091	894.755	Pos	Tier 2	0.0670575	2.5875	1.3716	0.071499	0.58261	NoSig	NA	1.4849	0.57041	0.039991	0.910625	Sig	↑	1.5888	0.66793	0.087566	0.763843	NoSig	NA
TG 46:8;O	Glycerolipids	Triradylglycerols	TG	12.7471	796.612	Pos	Tier 3	4.87041	0.92963	-0.10527	0.71301	0.92098	NoSig	NA	0.56833	-0.8152	0.0068163	0.664644	Sig	↓	0.65663	-0.60684	0.090424	0.763843	NoSig	NA
TG 61:3	Glycerolipids	Triradylglycerols	TG	19.8049	1000.93	Pos	Tier 3	1.70619	1.4739	0.55969	0.16411	0.682897	NoSig	NA	1.3031	0.38194	0.025261	0.798794	Sig	↑	1.3814	0.46612	0.099105	0.763843	NoSig	NA
TG 91:17;O2	Glycerolipids	Triradylglycerols	TG	12.6431	1430.13	Pos	Tier 3	3.22783	1.4338	0.51983	0.072666	0.58261	NoSig	NA	1.2307	0.29946	0.026208	0.804061	Sig	↑	1.359	0.44255	0.11803	0.763849	NoSig	NA
TG 63:3;O3	Glycerolipids	Triradylglycerols	TG	18.2266	1081.9	Pos	Tier 3	2.04644	0.88781	-0.17167	0.23614	0.693616	NoSig	NA	0.84471	-0.24347	0.04405	0.910625	Sig	↓	0.88174	-0.18157	0.32841	0.880731	NoSig	NA
DG 38:2	Glycerolipids	Diradylglycerols	DG	8.61005	631.568	Pos	Tier 3	3.47533	1.0042	0.0060648	0.9579	0.987225	NoSig	NA	1.1732	0.23046	0.046625	0.910625	Sig	↑	1.0622	0.087122	0.39388	0.892805	NoSig	NA
TG 49:0;O	Glycerolipids	Triradylglycerols	TG	14.7044	859.739	Pos	Tier 3	3.45025	1.056	0.078557	0.79245	0.93759	NoSig	NA	1.2972	0.37544	0.017343	0.782475	Sig	↑	1.0866	0.11978	0.47259	0.909583	NoSig	NA
DG 28:0;O	Glycerolipids	Diradylglycerols	DG	8.05976	546.477	Pos	Tier 3	7.79081	1.1539	0.20655	0.22287	0.690331	NoSig	NA	1.2926	0.37028	0.020303	0.798794	Sig	↑	1.024	0.034262	0.70863	0.963012	NoSig	NA
DG 41:2;O2	Glycerolipids	Diradylglycerols	DG	10.7313	745.596	Pos	Tier 3	0.507884	1.1354	0.18315	0.33388	0.728984	NoSig	NA	0.87692	-0.18948	0.021787	0.798794	Sig	↓	0.9747	-0.036972	0.71561	0.963012	NoSig	NA
DG O-52:13	Glycerolipids	Diradylglycerols	O-DG	13.9659	791.637	Pos	Tier 3	3.77053	0.8223	-0.28226	0.011569	0.466777	Sig	↓	0.78661	-0.34629	0.025342	0.798794	Sig	↓	0.75131	-0.41252	0.0055158	0.576903	Sig	↓
DGCC 32:0	Glycerolipids	Other Glycerolipids	DGCC	13.7665	745.631	Pos	Tier 3	1.20671	1.4895	0.57485	0.0032482	0.422717	Sig	↑	1.5363	0.6195	0.021962	0.798794	Sig	↑	1.3969	0.48221	0.010781	0.606664	Sig	↑
TG 52:6	Glycerolipids	Triradylglycerols	TG	17.5347	873.695	Pos	Tier 3	0.954501	1.5636	0.64489	0.019722	0.466777	Sig	↑	1.3395	0.42172	0.012164	0.69855	Sig	↑	1.4784	0.56406	0.018085	0.609978	Sig	↑
TG 16:1_18:2_18:3	Glycerolipids	Triradylglycerols	TG	17.5256	868.74	Pos	Tier 1	0.299284	1.8699	0.90299	0.039048	0.511212	Sig	↑	1.411	0.49668	0.012447	0.69855	Sig	↑	1.5773	0.65744	0.021032	0.609978	Sig	↑
TG 58:6	Glycerolipids	Triradylglycerols	TG	17.5201	952.834	Pos	Tier 3	1.04514	1.9089	0.93273	0.04587	0.531117	Sig	↑	1.5175	0.60172	0.016454	0.782475	Sig	↑	1.5666	0.64762	0.024637	0.609978	Sig	↑
DG 36:3	Glycerolipids	Diradylglycerols	DG	12.6684	636.557	Pos	Tier 3	0.892449	1.4031	0.48864	0.020183	0.466777	Sig	↑	1.1915	0.25277	0.035237	0.889864	Sig	↑	1.4224	0.50829	0.026495	0.615808	Sig	↑
TG 79:19;O	Glycerolipids	Triradylglycerols	TG	11.781	1241.91	Pos	Tier 3	1.94188	0.75687	-0.40187	0.02016	0.466777	Sig	↓	0.85017	-0.23417	0.029427	0.835945	Sig	↓	0.84174	-0.24855	0.036321	0.690699	Sig	↓
DG 41:3	Glycerolipids	Diradylglycerols	DG	12.6642	706.635	Pos	Tier 3	1.15016	1.4333	0.51931	0.028043	0.485624	Sig	↑	1.2913	0.36886	0.032875	0.859607	Sig	↑	1.3052	0.38424	0.045755	0.700904	Sig	↑
TG 16:0_18:2_18:3	Glycerolipids	Triradylglycerols	TG	18.1571	870.757	Pos	Tier 2	2.18201	2.1391	1.097	0.046873	0.533435	Sig	↑	1.3459	0.42855	0.03068	0.841317	Sig	↑	1.4959	0.58097	0.057007	0.722514	NoSig	NA
TG 58:5	Glycerolipids	Triradylglycerols	TG	18.1201	954.849	Pos	Tier 3	1.14964	1.8633	0.89786	0.0455	0.531117	Sig	↑	1.3333	0.41496	0.030602	0.841317	Sig	↑	1.3935	0.47867	0.077806	0.763843	NoSig	NA
TG 55:4	Glycerolipids	Triradylglycerols	TG	19.3182	914.819	Pos	Tier 3	2.48331	1.6193	0.6954	0.022445	0.472493	Sig	↑	1.366	0.44999	0.04307	0.910625	Sig	↑	1.4819	0.5674	0.15752	0.799369	NoSig	NA
TG 80:20;O	Glycerolipids	Triradylglycerols	TG	11.806	1253.91	Pos	Tier 3	3.71022	0.70579	-0.50268	0.0075902	0.458064	Sig	↓	0.78509	-0.34907	0.041835	0.910625	Sig	↓	1.0068	0.0097164	0.9349	0.990268	NoSig	NA
TG 47:4;O2	Glycerolipids	Triradylglycerols	TG	14.7051	839.64	Pos	Tier 3	3.44333	0.79428	-0.33229	0.021414	0.466777	Sig	↓	1.3032	0.38201	0.0037419	0.538132	Sig	↑	1.0018	0.0025595	0.98615	0.997466	NoSig	NA
PA O-50:0	Glycerophospholipids	Glycerophosphates	O-PA	17.7247	909.766	Pos	Tier 3	1.84827	1.9541	0.96648	0.094367	0.644328	NoSig	NA	1.4841	0.56956	0.077611	0.981545	NoSig	NA	1.4481	0.53414	0.0041007	0.576903	Sig	↑
PE 20:4_20:4	Glycerophospholipids	Glycerophosphoethanolamines	PE	7.90891	786.509	Neg	Tier 1	1.64016	1.0843	0.11682	0.5114	0.836383	NoSig	NA	1.1546	0.20744	0.30105	0.998251	NoSig	NA	1.6611	0.73217	0.00445	0.576903	Sig	↑
PI 12:0_22:3	Glycerophospholipids	Glycerophosphoinositols	PI	5.79003	831.503	Neg	Tier 1	0.613348	1.1499	0.20151	0.24758	0.698139	NoSig	NA	1.0527	0.074117	0.68462	0.999325	NoSig	NA	1.5111	0.59555	0.0053043	0.576903	Sig	↑
PG dO-40:0	Glycerophospholipids	Glycerophosphoglycerols	O-PG	6.93297	773.552	Pos	Tier 3	5.09895	1.3239	0.40478	0.50315	0.834092	NoSig	NA	1.1775	0.23576	0.46892	0.998251	NoSig	NA	1.3543	0.43759	0.0090793	0.606664	Sig	↑
LPS 21:0;O	Glycerophospholipids	Glycerophosphoserines	Ox-LPS	1.05069	584.357	Pos	Tier 3	1.65767	1.742	0.80073	0.28673	0.717137	NoSig	NA	1.2059	0.27006	0.074151	0.981545	NoSig	NA	1.3063	0.38552	0.0099193	0.606664	Sig	↑
PE 18:2_20:4	Glycerophospholipids	Glycerophosphoethanolamines	PE	8.32982	762.509	Neg	Tier 1	1.57376	1.0731	0.10179	0.59794	0.869322	NoSig	NA	1.0059	0.008421	0.9534	0.999325	NoSig	NA	1.5205	0.60453	0.010565	0.606664	Sig	↑
PS 35:1	Glycerophospholipids	Glycerophosphoserines	PS	7.75265	774.53	Neg	Tier 3	1.09473	1.1135	0.15507	0.34843	0.736891	NoSig	NA	1.1508	0.20266	0.40952	0.998251	NoSig	NA	1.6337	0.70812	0.013993	0.609978	Sig	↑
LPG O-24:0;O	Glycerophospholipids	Glycerophosphoethanolamines	O-LPE	3.199	597.414	Neg	Tier 3	1.12463	1.0798	0.11072	0.52992	0.842703	NoSig	NA	1.1017	0.13976	0.47162	0.998251	NoSig	NA	1.3605	0.44411	0.015114	0.609978	Sig	↑
PS 37:0;O	Glycerophospholipids	Glycerophosphoserines	Ox-PS	9.05663	820.572	Neg	Tier 3	0.8082	1.0026	0.0037882	0.97873	0.992654	NoSig	NA	0.97001	-0.043926	0.62824	0.999325	NoSig	NA	0.84249	-0.24727	0.016985	0.609978	Sig	↓
PG 36:2;O	Glycerophospholipids	Glycerophosphoglycerols	Ox-PG	9.19878	791.544	Pos	Tier 3	1.30418	0.8586	-0.21995	0.086281	0.619684	NoSig	NA	1.0649	0.0907	0.45278	0.998251	NoSig	NA	1.2956	0.37365	0.018884	0.609978	Sig	↑
PE 18:1_18:1	Glycerophospholipids	Glycerophosphoethanolamines	PE	11.4942	742.54	Neg	Tier 1	1.49487	1.5409	0.62375	0.19128	0.682897	NoSig	NA	1.0663	0.092551	0.51613	0.999325	NoSig	NA	1.4617	0.54764	0.020749	0.609978	Sig	↑
PE 16:3_24:4	Glycerophospholipids	Glycerophosphoethanolamines	PE	9.19468	790.541	Pos	Tier 2	3.20035	0.93464	-0.097513	0.30711	0.723491	NoSig	NA	1.0937	0.12921	0.23861	0.998251	NoSig	NA	1.3139	0.39383	0.020828	0.609978	Sig	↑
PG 40:4	Glycerophospholipids	Glycerophosphoglycerols	PG	10.2241	849.562	Pos	Tier 3	0.416176	0.79657	-0.32812	0.053516	0.541223	NoSig	NA	0.73691	-0.44045	0.071748	0.981545	NoSig	NA	1.1814	0.24052	0.021591	0.609978	Sig	↑
PIP 37:6	Glycerophospholipids	Glycerophosphoinositol phosphates	PIP	8.5944	949.487	Pos	Tier 3	3.63529	0.98099	-0.027693	0.84351	0.952691	NoSig	NA	0.86223	-0.21386	0.10005	0.988503	NoSig	NA	0.80395	-0.31483	0.022682	0.609978	Sig	↓
PG O-60:8	Glycerophospholipids	Glycerophosphoglycerols	O-PG	9.1848	1083.84	Neg	Tier 3	0.841595	0.89768	-0.15572	0.56961	0.860535	NoSig	NA	0.78418	-0.35074	0.11695	0.988503	NoSig	NA	0.67185	-0.5738	0.023255	0.609978	Sig	↓
LPA 20:0	Glycerophospholipids	Glycerophosphates	LPA	1.56737	484.343	Pos	Tier 3	6.29197	1.1282	0.17401	0.13199	0.674684	NoSig	NA	1.1446	0.19483	0.078261	0.981545	NoSig	NA	1.3003	0.37885	0.025351	0.609978	Sig	↑
PA 50:10	Glycerophospholipids	Glycerophosphates	PA	11.9652	903.591	Pos	Tier 3	4.61502	0.97503	-0.036488	0.86949	0.961163	NoSig	NA	0.81722	-0.2912	0.11728	0.988503	NoSig	NA	0.70041	-0.51373	0.026795	0.616553	Sig	↓
PS 45:0;O	Glycerophospholipids	Glycerophosphoserines	Ox-PS	8.97084	934.712	Pos	Tier 3	1.52297	1.0161	0.023038	0.84242	0.952451	NoSig	NA	1.1221	0.16617	0.16305	0.998251	NoSig	NA	1.215	0.28098	0.028099	0.624075	Sig	↑
PC O-37:1	Glycerophospholipids	Glycerophosphocholines	O-PC	15.0745	810.638	Pos	Tier 3	4.57056	1.1785	0.23693	0.4599	0.806578	NoSig	NA	0.83799	-0.255	0.10105	0.988503	NoSig	NA	0.77355	-0.37044	0.039523	0.700904	Sig	↓
PG 46:10	Glycerophospholipids	Glycerophosphoglycerols	PG	12.5557	921.562	Pos	Tier 3	0.794593	1.0652	0.091154	0.67707	0.90759	NoSig	NA	0.90213	-0.14859	0.2158	0.998251	NoSig	NA	0.86682	-0.2062	0.040535	0.700904	Sig	↓
PS 45:7	Glycerophospholipids	Glycerophosphoserines	PS	8.9641	902.593	Neg	Tier 3	1.63679	0.89367	-0.16218	0.25004	0.698173	NoSig	NA	0.8444	-0.24401	0.14394	0.998251	NoSig	NA	0.78868	-0.34249	0.040598	0.700904	Sig	↓
PE 21:1_22:6	Glycerophospholipids	Glycerophosphoethanolamines	PE	11.113	832.585	Pos	Tier 2	0.15614	0.94717	-0.078312	0.68893	0.915259	NoSig	NA	0.79947	-0.32288	0.19366	0.998251	NoSig	NA	0.70386	-0.50664	0.041344	0.700904	Sig	↓
PI O-38:4	Glycerophospholipids	Glycerophosphoinositols	O-PI	8.52556	855.578	Pos	Tier 3	3.64551	1.3731	0.4574	0.16511	0.682897	NoSig	NA	0.87921	-0.18571	0.17544	0.998251	NoSig	NA	0.78503	-0.34918	0.043199	0.700904	Sig	↓
PG O-28:2	Glycerophospholipids	Glycerophosphoglycerols	O-PG	3.34461	647.43	Neg	Tier 3	0.621494	0.96411	-0.052728	0.72618	0.92289	NoSig	NA	0.93028	-0.10426	0.43285	0.998251	NoSig	NA	1.1354	0.18317	0.043978	0.700904	Sig	↑
PS 18:0_20:3;O2;Cyc	Glycerophospholipids	Glycerophosphoserines	PS	7.92272	842.518	Neg	Tier 1	0.106823	1.2711	0.34607	0.19949	0.682897	NoSig	NA	1.0567	0.079557	0.58576	0.999325	NoSig	NA	1.0998	0.13718	0.044427	0.700904	Sig	↑
PC 18:3_20:4	Glycerophospholipids	Glycerophosphocholines	PC	6.92408	804.554	Pos	Tier 1	0.783042	1.0993	0.13659	0.65313	0.901766	NoSig	NA	1.122	0.16612	0.3697	0.998251	NoSig	NA	1.3973	0.48264	0.047248	0.700904	Sig	↑
PI 63:10	Glycerophospholipids	Glycerophosphoinositols	PI	10.4839	1242.89	Pos	Tier 3	3.08934	0.73285	-0.44842	0.0035602	0.422717	Sig	↓	0.86506	-0.20914	0.083321	0.981545	NoSig	NA	0.72814	-0.4577	0.0041165	0.576903	Sig	↓
PA 42:4	Glycerophospholipids	Glycerophosphates	PA	4.66923	781.576	Pos	Tier 3	2.3137	2.2296	1.1568	0.0064092	0.446896	Sig	↑	1.6666	0.73691	0.075998	0.981545	NoSig	NA	1.7861	0.83683	0.012128	0.606664	Sig	↑
PS O-40:6	Glycerophospholipids	Glycerophosphoserines	O-PS	5.36381	822.565	Pos	Tier 3	1.39004	1.5439	0.62656	0.016276	0.466777	Sig	↑	1.3564	0.4398	0.090056	0.981545	NoSig	NA	1.3307	0.41219	0.019273	0.609978	Sig	↑
PC 36:4;O	Glycerophospholipids	Glycerophosphocholines	Ox-PC	5.74667	798.565	Pos	Tier 3	0.453886	1.4047	0.49029	0.045913	0.531117	Sig	↑	1.1037	0.14228	0.63378	0.999325	NoSig	NA	1.3337	0.41549	0.019812	0.609978	Sig	↑
PC 42:6	Glycerophospholipids	Glycerophosphocholines	PC	11.2789	862.635	Pos	Tier 3	2.95603	0.66739	-0.5834	0.00029214	0.168054	Sig	↓	0.85297	-0.22944	0.075432	0.981545	NoSig	NA	0.85661	-0.22329	0.023648	0.609978	Sig	↓
LPS O-24:1;O	Glycerophospholipids	Glycerophosphoethanolamines	O-LPE	2.88304	608.398	Neg	Tier 3	7.24313	1.4612	0.54714	0.0088322	0.458064	Sig	↑	1.231	0.29984	0.0507	0.910625	NoSig	NA	1.2526	0.32497	0.028182	0.624075	Sig	↑
LPC O-18:2	Glycerophospholipids	Glycerophosphocholines	O-LPC	2.02803	506.361	Pos	Tier 3	0.66686	1.2245	0.29215	0.028577	0.485624	Sig	↑	1.1942	0.25604	0.061493	0.981545	NoSig	NA	1.3215	0.40222	0.029366	0.627054	Sig	↑
PC 41:2	Glycerophospholipids	Glycerophosphocholines	PC	11.6178	856.683	Pos	Tier 3	4.74128	0.64383	-0.63525	0.0097622	0.466777	Sig	↓	0.82371	-0.2798	0.14585	0.998251	NoSig	NA	0.77029	-0.37654	0.057177	0.722514	NoSig	NA
PC O-16:0_24:4	Glycerophospholipids	Glycerophosphocholines	O-PC	12.9477	868.645	Neg	Tier 1	1.94556	0.88942	-0.16906	0.034834	0.50298	Sig	↓	0.89415	-0.16142	0.14209	0.998251	NoSig	NA	0.84212	-0.24791	0.073047	0.763843	NoSig	NA
PG 49:1;O	Glycerophospholipids	Glycerophosphoglycerols	Ox-PG	18.1992	973.752	Neg	Tier 3	4.50675	1.654	0.72599	0.040985	0.52103	Sig	↑	1.1393	0.1882	0.51196	0.999325	NoSig	NA	1.5715	0.65217	0.075074	0.763843	NoSig	NA
PS 39:6	Glycerophospholipids	Glycerophosphoserines	PS	8.42761	822.53	Pos	Tier 3	1.91961	1.394	0.47925	0.03651	0.50298	Sig	↑	1.0566	0.079479	0.49859	0.998251	NoSig	NA	1.2059	0.27009	0.078279	0.763843	NoSig	NA
LPE O-32:6	Glycerophospholipids	Glycerophosphoethanolamines	O-LPE	4.45195	650.458	Neg	Tier 3	4.51137	1.2868	0.36382	0.032903	0.501346	Sig	↑	1.1328	0.17987	0.23288	0.998251	NoSig	NA	1.2282	0.29655	0.08839	0.763843	NoSig	NA
PA 40:3	Glycerophospholipids	Glycerophosphates	PA	4.64579	755.561	Pos	Tier 3	2.71154	1.4623	0.5482	0.025919	0.485624	Sig	↑	1.1749	0.23251	0.2379	0.998251	NoSig	NA	1.3257	0.40671	0.089305	0.763843	NoSig	NA
PC 16:0_22:6;O	Glycerophospholipids	Glycerophosphocholines	PC	5.3459	866.556	Neg	Tier 1	1.82331	1.5779	0.65805	0.0039985	0.438121	Sig	↑	1.2172	0.28352	0.14521	0.998251	NoSig	NA	1.2088	0.27356	0.091149	0.763843	NoSig	NA
PG 38:4,O	Glycerophospholipids	Glycerophosphoglycerols	PG	#N/A	#N/A	#N/A	#N/A	#N/A	2.1996	1.1372	0.047782	0.534971	Sig	↑	0.92236	-0.11659	0.36724	0.998251	NoSig	NA	0.86031	-0.21707	0.097855	0.763843	NoSig	NA
PE 18:0_20:3;O4;Cyc	Glycerophospholipids	Glycerophosphoethanolamines	PE	6.04984	832.539	Neg	Tier 1	5.45323	1.2961	0.37417	0.048605	0.537201	Sig	↑	1.2306	0.2994	0.059487	0.972017	NoSig	NA	1.3255	0.40657	0.11674	0.763849	NoSig	NA
PC 34:3	Glycerophospholipids	Glycerophosphocholines	PC	6.93097	778.538	Pos	Tier 3	2.8787	0.59887	-0.73969	0.010445	0.466777	Sig	↓	0.75109	-0.41293	0.082559	0.981545	NoSig	NA	0.79023	-0.33966	0.11948	0.763849	NoSig	NA
PC 40:2	Glycerophospholipids	Glycerophosphocholines	PC	11.1287	864.646	Pos	Tier 3	0.279211	0.83574	-0.25888	0.035082	0.50298	Sig	↓	0.83932	-0.2527	0.19218	0.998251	NoSig	NA	0.88293	-0.17963	0.12064	0.763849	NoSig	NA
PC O-36:1	Glycerophospholipids	Glycerophosphocholines	O-PC	13.6078	796.621	Pos	Tier 3	3.10225	1.1881	0.24864	0.024979	0.485124	Sig	↑	0.98657	-0.019501	0.79085	0.999325	NoSig	NA	1.0852	0.11795	0.16174	0.802077	NoSig	NA
PS 21:0_20:2	Glycerophospholipids	Glycerophosphoserines	PS	11.7904	856.608	Neg	Tier 1	1.6577	0.76453	-0.38736	0.039683	0.512981	Sig	↓	0.81872	-0.28856	0.062729	0.981545	NoSig	NA	0.82985	-0.26908	0.17689	0.8127	NoSig	NA
LPI O-23:0	Glycerophospholipids	Glycerophosphoinositols	O-LPI	3.53298	655.422	Neg	Tier 3	3.91969	1.2544	0.32699	0.019743	0.466777	Sig	↑	1.1533	0.20573	0.10968	0.988503	NoSig	NA	1.1775	0.23576	0.18363	0.820452	NoSig	NA
LPE 20:5	Glycerophospholipids	Glycerophosphoethanolamines	LPE	1.56285	500.277	Pos	Tier 3	0.16424	1.4804	0.56598	0.014626	0.466777	Sig	↑	1.0509	0.071661	0.46375	0.998251	NoSig	NA	1.214	0.2798	0.21418	0.855677	NoSig	NA
PS 27:0_18:4	Glycerophospholipids	Glycerophosphoserines	PS	13.264	908.64	Neg	Tier 1	2.03601	0.72771	-0.45856	0.044954	0.531117	Sig	↓	0.88189	-0.18132	0.35825	0.998251	NoSig	NA	0.89635	-0.15786	0.22342	0.855677	NoSig	NA
PC 37:7	Glycerophospholipids	Glycerophosphocholines	PC	7.44455	812.523	Pos	Tier 3	3.94537	0.75935	-0.39716	0.020065	0.466777	Sig	↓	0.85895	-0.21935	0.23523	0.998251	NoSig	NA	1.1864	0.24654	0.23923	0.863198	NoSig	NA
PC 41:6	Glycerophospholipids	Glycerophosphocholines	PC	11.3738	848.619	Pos	Tier 3	2.74536	0.75316	-0.40898	0.004735	0.439023	Sig	↓	0.93726	-0.093479	0.2434	0.998251	NoSig	NA	0.92516	-0.11222	0.30123	0.880731	NoSig	NA
PC O-48:2	Glycerophospholipids	Glycerophosphocholines	O-PC	#N/A	#N/A	#N/A	#N/A	#N/A	1.3829	0.46765	0.00057128	0.239906	Sig	↑	1.1173	0.16	0.22252	0.998251	NoSig	NA	1.1124	0.15368	0.30322	0.880731	NoSig	NA
PE 22:0_27:0	Glycerophospholipids	Glycerophosphoethanolamines	PE	19.0529	928.771	Neg	Tier 1	3.00396	1.55	0.63227	0.021453	0.466777	Sig	↑	1.2224	0.28969	0.10567	0.988503	NoSig	NA	1.3104	0.38998	0.32698	0.880731	NoSig	NA
PI 43:5;O	Glycerophospholipids	Glycerophosphoinositols	Ox-PI	7.39222	969.611	Neg	Tier 3	3.95418	1.2593	0.33263	0.035554	0.50298	Sig	↑	1.2107	0.27583	0.25596	0.998251	NoSig	NA	1.2785	0.35443	0.37806	0.891249	NoSig	NA
LPC O-15:1	Glycerophospholipids	Glycerophosphocholines	O-LPC	3.15815	466.331	Pos	Tier 3	4.57101	1.3905	0.47564	0.012641	0.466777	Sig	↑	1.1094	0.14972	0.18807	0.998251	NoSig	NA	1.1094	0.14977	0.38295	0.892805	NoSig	NA
PE 48:8	Glycerophospholipids	Glycerophosphoethanolamines	PE	12.6634	898.636	Neg	Tier 3	3.31131	0.71422	-0.48557	0.0047591	0.439023	Sig	↓	1.0111	0.015997	0.86796	0.999325	NoSig	NA	0.92802	-0.10777	0.39442	0.892805	NoSig	NA
PC 36:4	Glycerophospholipids	Glycerophosphocholines	PC	7.09825	804.554	Pos	Tier 3	2.91083	0.72654	-0.46089	0.015319	0.466777	Sig	↓	0.91427	-0.1293	0.33666	0.998251	NoSig	NA	1.0543	0.076344	0.40385	0.892805	NoSig	NA
PC 15:0_15:0	Glycerophospholipids	Glycerophosphocholines	PC	#N/A	#N/A	#N/A	#N/A	#N/A	1.5561	0.63793	0.0059641	0.44269	Sig	↑	1.6403	0.71392	0.052635	0.910625	NoSig	NA	0.8776	-0.18837	0.42382	0.892881	NoSig	NA
PIP3 43:10	Glycerophospholipids	Glycerophosphoinositol phosphates	PIP3	12.8857	1202.48	Pos	Tier 3	3.14493	0.79791	-0.3257	0.027142	0.485624	Sig	↓	1.0872	0.12059	0.49032	0.998251	NoSig	NA	1.1334	0.1806	0.46613	0.908102	NoSig	NA
PG 34:0;O	Glycerophospholipids	Glycerophosphoglycerols	Ox-PG	9.73668	767.547	Pos	Tier 3	5.24565	0.71272	-0.48858	0.019995	0.466777	Sig	↓	0.80197	-0.31837	0.050876	0.910625	NoSig	NA	1.0768	0.10675	0.57838	0.937902	NoSig	NA
PC O-31:0	Glycerophospholipids	Glycerophosphocholines	O-PC	11.0942	706.577	Pos	Tier 3	3.47521	0.81363	-0.29755	0.016098	0.466777	Sig	↓	0.90487	-0.14422	0.20727	0.998251	NoSig	NA	0.9477	-0.077502	0.59754	0.943665	NoSig	NA
PG 17:0_15:0	Glycerophospholipids	Glycerophosphoglycerols	PG	#N/A	#N/A	#N/A	#N/A	#N/A	1.5932	0.6719	0.00024199	0.168054	Sig	↑	0.95304	-0.069384	0.46575	0.998251	NoSig	NA	1.0287	0.040891	0.68014	0.961894	NoSig	NA
PA O-58:4	Glycerophospholipids	Glycerophosphates	O-PA	19.1932	991.848	Pos	Tier 3	2.4232	1.3677	0.45172	0.03473	0.50298	Sig	↑	1.0532	0.074838	0.70834	0.999325	NoSig	NA	1.0415	0.058667	0.69298	0.962292	NoSig	NA
PA 46:0;O	Glycerophospholipids	Glycerophosphates	Ox-PA	14.2698	859.683	Neg	Tier 3	3.75629	1.2637	0.33771	0.038283	0.50626	Sig	↑	1.0804	0.1116	0.39641	0.998251	NoSig	NA	1.0433	0.061209	0.69411	0.962292	NoSig	NA
PG 49:3;O	Glycerophospholipids	Glycerophosphoglycerols	Ox-PG	18.6248	971.733	Pos	Tier 3	2.00984	1.4055	0.49107	0.046164	0.531117	Sig	↑	1.1982	0.26089	0.34344	0.998251	NoSig	NA	1.0659	0.092139	0.71535	0.963012	NoSig	NA
PA O-38:0	Glycerophospholipids	Glycerophosphates	O-PA	10.0763	719.599	Pos	Tier 3	6.27755	1.1913	0.25251	0.023514	0.478812	Sig	↑	1.083	0.11497	0.26843	0.998251	NoSig	NA	1.0113	0.016187	0.92347	0.987409	NoSig	NA
PE 41:9;O	Glycerophospholipids	Glycerophosphoethanolamines	Ox-PE	7.30186	814.506	Neg	Tier 3	3.99012	1.3605	0.44415	0.032997	0.501346	Sig	↑	1.173	0.23023	0.24412	0.998251	NoSig	NA	0.98851	-0.016677	0.92838	0.987625	NoSig	NA
PI O-46:8	Glycerophospholipids	Glycerophosphoinositols	O-PI	14.694	975.635	Neg	Tier 3	1.54407	1.215	0.28096	0.046056	0.531117	Sig	↑	1.066	0.092198	0.54895	0.999325	NoSig	NA	0.99213	-0.011405	0.94811	0.990295	NoSig	NA
PC O-16:0/18:0	Glycerophospholipids	Glycerophosphocholines	O-PC	#N/A	#N/A	#N/A	#N/A	#N/A	1.6546	0.7265	0.015534	0.466777	Sig	↑	1.252	0.32418	0.16736	0.998251	NoSig	NA	0.99024	-0.014145	0.94953	0.990295	NoSig	NA
PIP 44:5	Glycerophospholipids	Glycerophosphoinositol phosphates	PIP	3.53007	1047.6	Neg	Tier 3	1.32557	1.4005	0.48599	0.0029997	0.422717	Sig	↑	1.1672	0.22303	0.25856	0.998251	NoSig	NA	1.008	0.011511	0.94994	0.990295	NoSig	NA
LPE 22:5	Glycerophospholipids	Glycerophosphoethanolamines	LPE	1.93603	528.309	Pos	Tier 3	0.705479	0.83274	-0.26407	0.099895	0.651305	NoSig	NA	0.66488	-0.58883	0.0027999	0.460184	Sig	↓	0.60331	-0.72902	0.0064127	0.588932	Sig	↓
PE O-16:1_26:4	Glycerophospholipids	Glycerophosphoethanolamines	O-PE	14.8497	806.608	Neg	Tier 1	2.50432	1.0509	0.071649	0.75874	0.932076	NoSig	NA	0.75943	-0.39701	0.0021075	0.409897	Sig	↓	0.74576	-0.42321	0.0066546	0.588932	Sig	↓
PS 20:4_20:4	Glycerophospholipids	Glycerophosphoserines	PS	5.75486	830.499	Neg	Tier 1	1.69778	0.99191	-0.011718	0.89037	0.967768	NoSig	NA	1.2366	0.30642	0.005341	0.630347	Sig	↑	1.9057	0.93029	0.016231	0.609978	Sig	↑
LPG 16:1	Glycerophospholipids	Glycerophosphoglycerols	LPG	2.04296	481.257	Neg	Tier 3	0.255047	1.2489	0.32071	0.056731	0.548614	NoSig	NA	1.1563	0.20948	0.0085179	0.69855	Sig	↑	1.1345	0.182	0.074351	0.763843	NoSig	NA
LPG 16:0	Glycerophospholipids	Glycerophosphoglycerols	LPG	1.29079	502.316	Pos	Tier 3	5.27378	0.96262	-0.054958	0.41891	0.783032	NoSig	NA	0.81936	-0.28744	0.013066	0.710099	Sig	↓	0.85179	-0.23142	0.091004	0.763843	NoSig	NA
PI 60:2	Glycerophospholipids	Glycerophosphoinositols	PI	12.8658	1216.97	Pos	Tier 3	1.93005	0.807	-0.30936	0.067083	0.57847	NoSig	NA	0.81705	-0.2915	0.044725	0.910625	Sig	↓	0.81431	-0.29635	0.12223	0.763849	NoSig	NA
PI 16:3_24:4	Glycerophospholipids	Glycerophosphoinositols	PI	6.65901	907.536	Neg	Tier 1	2.24785	1.0601	0.084233	0.7002	0.918487	NoSig	NA	1.2335	0.30274	0.045212	0.910625	Sig	↑	1.2368	0.30661	0.16226	0.802437	NoSig	NA
PG 41:0;O	Glycerophospholipids	Glycerophosphoglycerols	Ox-PG	13.2474	865.653	Pos	Tier 3	0.139942	0.75434	-0.40672	0.075428	0.592354	NoSig	NA	0.76972	-0.3776	0.042064	0.910625	Sig	↓	0.83603	-0.25838	0.17335	0.8127	NoSig	NA
PIP3 35:5;O	Glycerophospholipids	Glycerophosphoinositol phosphates	PIP3	14.5833	1099.4	Pos	Tier 3	3.47508	1.0641	0.089581	0.28824	0.71857	NoSig	NA	1.1537	0.20627	0.025839	0.803453	Sig	↑	1.0661	0.092292	0.20653	0.850055	NoSig	NA
PA 26:1_26:4	Glycerophospholipids	Glycerophosphates	PA	16.0566	917.705	Neg	Tier 1	5.00163	1.4468	0.53289	0.05857	0.551414	NoSig	NA	1.3336	0.41535	0.01229	0.69855	Sig	↑	1.0892	0.12329	0.28612	0.880731	NoSig	NA
PG 41:1	Glycerophospholipids	Glycerophosphoglycerols	PG	12.8722	847.643	Pos	Tier 3	0.444111	1.1092	0.14946	0.27944	0.710019	NoSig	NA	0.88266	-0.18008	0.020067	0.798794	Sig	↓	1.134	0.18148	0.29203	0.880731	NoSig	NA
PC O-18:1_21:2	Glycerophospholipids	Glycerophosphocholines	O-PC	16.7461	812.656	Pos	Tier 2	2.7564	0.83888	-0.25346	0.13643	0.674684	NoSig	NA	0.76825	-0.38034	0.028158	0.809894	Sig	↓	0.87113	-0.19904	0.29783	0.880731	NoSig	NA
PC 55:7	Glycerophospholipids	Glycerophosphocholines	PC	18.1386	1064.8	Pos	Tier 3	1.50219	0.98689	-0.019039	0.87817	0.964534	NoSig	NA	1.2188	0.28547	0.027683	0.809894	Sig	↑	1.0578	0.081112	0.34693	0.880731	NoSig	NA
PC 14:0_22:6	Glycerophospholipids	Glycerophosphocholines	PC	6.29967	778.539	Pos	Tier 1	0.0513783	1.1025	0.14076	0.65462	0.902505	NoSig	NA	1.1503	0.20198	0.016522	0.782475	Sig	↑	1.0934	0.1288	0.35398	0.882457	NoSig	NA
PC O-18:1_26:2	Glycerophospholipids	Glycerophosphocholines	O-PC	16.7424	882.734	Pos	Tier 1	2.97939	0.82675	-0.27448	0.15363	0.682897	NoSig	NA	0.76036	-0.39525	0.048766	0.910625	Sig	↓	0.8704	-0.20025	0.36909	0.889294	NoSig	NA
PG 34:1	Glycerophospholipids	Glycerophosphoglycerols	PG	9.10707	749.534	Pos	Tier 3	1.63788	1.0505	0.071118	0.59258	0.869131	NoSig	NA	0.8594	-0.2186	0.011371	0.69855	Sig	↓	0.93971	-0.089708	0.45145	0.899341	NoSig	NA
PC 36:0	Glycerophospholipids	Glycerophosphocholines	PC	12.044	790.636	Pos	Tier 3	5.23917	0.81124	-0.3018	0.19293	0.682897	NoSig	NA	0.7254	-0.46316	0.038135	0.895394	Sig	↓	0.91459	-0.12881	0.47155	0.909583	NoSig	NA
PC 56:3;O	Glycerophospholipids	Glycerophosphocholines	Ox-PC	17.9759	1080.9	Pos	Tier 3	3.67815	0.91617	-0.12631	0.44545	0.798894	NoSig	NA	0.77212	-0.37309	0.038057	0.895394	Sig	↓	0.94186	-0.086421	0.67548	0.960095	NoSig	NA
LPC 25:7	Glycerophospholipids	Glycerophosphocholines	LPC	2.52335	590.361	Pos	Tier 3	0.950006	1.0802	0.11132	0.5064	0.834092	NoSig	NA	1.2092	0.27405	0.022962	0.798794	Sig	↑	0.97586	-0.035254	0.71105	0.963012	NoSig	NA
PC 20:2	Glycerophospholipids	Glycerophosphocholines	PC	1.27018	584.334	Pos	Tier 3	3.37582	1.1295	0.17572	0.64829	0.901339	NoSig	NA	0.71696	-0.48003	0.042724	0.910625	Sig	↓	1.0516	0.07265	0.72127	0.963012	NoSig	NA
PS 65:11	Glycerophospholipids	Glycerophosphoserines	PS	15.9158	1176.86	Pos	Tier 3	1.29863	0.99024	-0.014145	0.97072	0.991684	NoSig	NA	0.78386	-0.35133	0.048621	0.910625	Sig	↓	1.0756	0.10519	0.78347	0.963012	NoSig	NA
PE O-16:1_18:1	Glycerophospholipids	Glycerophosphoethanolamines	O-PE	12.1642	700.528	Neg	Tier 1	0.670922	0.99013	-0.014304	0.93045	0.983292	NoSig	NA	0.86022	-0.21722	0.0094069	0.69855	Sig	↓	0.9802	-0.028846	0.78778	0.963012	NoSig	NA
PC 27:0_13:1	Glycerophospholipids	Glycerophosphocholines	PC	15.061	888.671	Neg	Tier 1	2.07051	1.0558	0.078345	0.34319	0.736744	NoSig	NA	0.85575	-0.22473	0.024999	0.798794	Sig	↓	0.9855	-0.021069	0.85613	0.974758	NoSig	NA
PI 38:5	Glycerophospholipids	Glycerophosphoinositols	PI	7.27786	902.575	Pos	Tier 3	0.151491	1.1827	0.24211	0.029915	0.485624	Sig	↑	1.5111	0.59559	0.027313	0.809894	Sig	↑	1.5397	0.62264	0.013858	0.609978	Sig	↑
PS 68:2	Glycerophospholipids	Glycerophosphoserines	PS	8.55875	1259.03	Pos	Tier 3	0.303389	1.3157	0.39586	0.026801	0.485624	Sig	↑	1.5902	0.66923	0.016925	0.782475	Sig	↑	1.82	0.86392	0.0192	0.609978	Sig	↑
LPC O-18:1	Glycerophospholipids	Glycerophosphocholines	O-LPC	3.04604	508.377	Pos	Tier 3	1.82707	1.2301	0.29874	0.0080981	0.458064	Sig	↑	1.1599	0.21401	0.011035	0.69855	Sig	↑	1.2132	0.27888	0.021275	0.609978	Sig	↑
LPG 18:2	Glycerophospholipids	Glycerophosphoglycerols	LPG	2.12134	507.273	Neg	Tier 3	0.851892	1.3108	0.39049	0.01235	0.466777	Sig	↑	1.2	0.26306	0.0087141	0.69855	Sig	↑	1.2661	0.34037	0.031018	0.631614	Sig	↑
PC 42:5;O	Glycerophospholipids	Glycerophosphocholines	Ox-PC	10.4951	880.647	Pos	Tier 3	5.52726	0.6855	-0.54476	0.0011834	0.289604	Sig	↓	0.78823	-0.34332	0.0030476	0.467502	Sig	↓	0.81066	-0.30283	0.05747	0.722514	NoSig	NA
PA O-51:0	Glycerophospholipids	Glycerophosphates	O-PA	18.1693	923.782	Pos	Tier 3	2.13035	1.6572	0.72875	0.04542	0.531117	Sig	↑	1.5771	0.65723	0.036984	0.889864	Sig	↑	1.6544	0.72633	0.061365	0.738287	NoSig	NA
PC 30:1	Glycerophospholipids	Glycerophosphocholines	PC	7.66356	704.523	Pos	Tier 3	0.137879	0.70666	-0.5009	0.035	0.50298	Sig	↓	0.69376	-0.5275	0.00042219	0.263511	Sig	↓	0.83367	-0.26245	0.11318	0.763849	NoSig	NA
PC 56:2;O	Glycerophospholipids	Glycerophosphocholines	Ox-PC	18.4449	1082.91	Pos	Tier 3	3.42174	0.77948	-0.35942	0.0089075	0.458064	Sig	↓	0.84791	-0.23802	0.048944	0.910625	Sig	↓	0.86823	-0.20384	0.12117	0.763849	NoSig	NA
PG 68:2	Glycerophospholipids	Glycerophosphoglycerols	PG	15.2331	1246.03	Pos	Tier 3	1.31148	1.3562	0.43955	0.031314	0.496921	Sig	↑	1.3222	0.40296	0.018995	0.798794	Sig	↑	1.2163	0.28246	0.12177	0.763849	NoSig	NA
PE 42:3	Glycerophospholipids	Glycerophosphoethanolamines	PE	11.2727	824.622	Neg	Tier 3	5.11004	0.81838	-0.28915	0.035462	0.50298	Sig	↓	0.77558	-0.36665	0.0097498	0.69855	Sig	↓	0.84765	-0.23846	0.12365	0.763849	NoSig	NA
LPC 15:0	Glycerophospholipids	Glycerophosphocholines	LPC	2.79866	504.307	Pos	Tier 3	1.97375	1.4962	0.58134	0.0090392	0.458064	Sig	↑	1.5651	0.64628	0.022341	0.798794	Sig	↑	0.91841	-0.12279	0.28	0.880731	NoSig	NA
Stenophylline A (plant metabolite)	Other	Other	Other	19.6456	674.595	Pos	Tier 2	7.33768	0.78884	-0.34219	0.03649	0.50298	Sig	↓	0.9586	-0.061006	0.62362	0.999325	NoSig	NA	1.0129	0.018458	0.89447	0.981193	NoSig	NA
PK 46:12;O26	Polyketides	Polyketides	Polyketides	13.6211	1041.34	Pos	Tier 3	4.57538	1.2585	0.33165	0.005169	0.439023	Sig	↑	1.0788	0.10943	0.16378	0.998251	NoSig	NA	0.901	-0.1504	0.17575	0.8127	NoSig	NA
PK 25:9;O5	Polyketides	Polyketides	Polyketides	4.59454	409.205	Neg	Tier 3	6.77942	1.4016	0.48711	0.018986	0.466777	Sig	↑	1.2994	0.37781	0.17081	0.998251	NoSig	NA	0.92128	-0.11829	0.55372	0.928912	NoSig	NA
PK 21:8;O5	Polyketides	Polyketides	Polyketides	3.22709	355.158	Neg	Tier 3	8.95932	1.2548	0.32746	0.018217	0.466777	Sig	↑	1.17	0.22652	0.12397	0.991106	NoSig	NA	0.93045	-0.104	0.71855	0.963012	NoSig	NA
PR 72:13;O7	Prenol Lipids	Prenol Lipids	PR	10.8672	1113.85	Pos	Tier 3	2.04151	1.0191	0.027314	0.93416	0.984498	NoSig	NA	0.80487	-0.31317	0.14935	0.998251	NoSig	NA	0.71592	-0.48212	0.011033	0.606664	Sig	↓
PR 40:15	Prenol Lipids	Prenol Lipids	PR	1.93819	555.397	Pos	Tier 3	1.1495	1.0307	0.043634	0.67582	0.90759	NoSig	NA	1.0432	0.061052	0.38046	0.998251	NoSig	NA	0.87337	-0.19534	0.024277	0.609978	Sig	↓
PR 40:13;O2	Prenol Lipids	Prenol Lipids	PR	4.43672	567.422	Pos	Tier 3	3.48508	1.3319	0.41354	0.010952	0.466777	Sig	↑	1.0717	0.099909	0.26106	0.998251	NoSig	NA	1.1565	0.20971	0.2082	0.853954	NoSig	NA
PR 35:0;O3	Prenol Lipids	Prenol Lipids	PR	12.9661	553.46	Pos	Tier 3	1.7098	1.3108	0.39048	0.036298	0.50298	Sig	↑	1.1328	0.17984	0.44272	0.998251	NoSig	NA	0.88932	-0.16922	0.34431	0.880731	NoSig	NA
PR 25:5;O5	Prenol Lipids	Prenol Lipids	PR	3.16458	434.29	Pos	Tier 3	0.00480473	0.97933	-0.030136	0.8613	0.957416	NoSig	NA	0.78985	-0.34036	0.044849	0.910625	Sig	↓	0.57293	-0.80357	0.0010281	0.394276	Sig	↓
PR 50:11;O4;P	Prenol Lipids	Prenol Lipids	PR	8.11084	801.594	Pos	Tier 3	2.88208	1.152	0.20415	0.20054	0.682897	NoSig	NA	1.2957	0.37371	0.036392	0.889864	Sig	↑	1.2545	0.32713	0.064764	0.748854	NoSig	NA
PR 31:4;O6	Prenol Lipids	Prenol Lipids	PR	4.42144	517.357	Pos	Tier 3	9.55553	0.82997	-0.26887	0.0069214	0.455033	Sig	↓	0.81264	-0.29932	0.0069324	0.664644	Sig	↓	0.62157	-0.68601	2.1116e-05	0.0485879	Sig	↓
Cer 37:6;O5	Sphingolipids	Ceramides	Cer	5.18372	616.462	Neg	Tier 3	5.42052	0.95765	-0.062432	0.60958	0.877749	NoSig	NA	1.091	0.12563	0.39918	0.998251	NoSig	NA	0.62178	-0.68551	0.00028754	0.305492	Sig	↓
SHexCer 35:2;O2	Sphingolipids	Glycosphingolipids	SHexCer	7.57059	792.533	Pos	Tier 3	4.52039	0.95809	-0.061765	0.60925	0.877749	NoSig	NA	0.95192	-0.071088	0.33693	0.998251	NoSig	NA	0.7879	-0.34392	0.0016653	0.478982	Sig	↓
HexCer d14:3_29:1;O2	Sphingolipids	Neutral glycosphingolipids	HexCer	14.7814	820.665	Pos	Tier 2	1.96182	0.91808	-0.1233	0.37042	0.745741	NoSig	NA	0.87329	-0.19547	0.074336	0.981545	NoSig	NA	0.81527	-0.29466	0.0045227	0.576903	Sig	↓
ACer 58:3;O2	Sphingolipids	Ceramides	ACer	19.5037	906.827	Pos	Tier 3	1.88157	1.2222	0.28944	0.15574	0.682897	NoSig	NA	1.098	0.13492	0.19477	0.998251	NoSig	NA	1.2753	0.35083	0.0097342	0.606664	Sig	↑
Hex2Cer 39:5;O2	Sphingolipids	Glycosphingolipids	Hex2Cer	8.58569	946.623	Pos	Tier 3	0.203544	0.8917	-0.16536	0.5152	0.837593	NoSig	NA	0.87674	-0.18978	0.23515	0.998251	NoSig	NA	0.764	-0.38835	0.011487	0.606664	Sig	↓
CerP 47:1;O2	Sphingolipids	Ceramides	Cer-1-P	14.7853	822.672	Pos	Tier 3	0.669016	0.99664	-0.0048526	0.9817	0.992654	NoSig	NA	0.85667	-0.22319	0.063085	0.981545	NoSig	NA	0.76932	-0.37835	0.013635	0.609978	Sig	↓
HexCer 49:3;O3	Sphingolipids	Neutral glycosphingolipids	HexCer	19.5378	920.757	Neg	Tier 3	1.27147	1.0715	0.099622	0.4311	0.791038	NoSig	NA	1.2376	0.30754	0.067325	0.981545	NoSig	NA	1.2395	0.30977	0.014825	0.609978	Sig	↑
PE-Cer 48:4;O2	Sphingolipids	Phosphosphingolipids	CerPE	17.9361	851.702	Pos	Tier 3	2.39569	1.434	0.52	0.1287	0.674684	NoSig	NA	1.1459	0.19644	0.34004	0.998251	NoSig	NA	1.343	0.42547	0.016587	0.609978	Sig	↑
MIPC 49:0;O3	Sphingolipids	Phosphosphingolipids	MIPC	10.9318	1187.87	Pos	Tier 3	3.70565	0.96721	-0.048094	0.55993	0.858851	NoSig	NA	1.0702	0.097851	0.33828	0.998251	NoSig	NA	1.1488	0.20012	0.016854	0.609978	Sig	↑
PI-Cer 40:6;O4	Sphingolipids	Phosphosphingolipids	IPC	6.47454	884.531	Neg	Tier 3	1.67582	0.99708	-0.0042132	0.98317	0.992661	NoSig	NA	0.94811	-0.076876	0.59157	0.999325	NoSig	NA	0.86804	-0.20416	0.020661	0.609978	Sig	↓
SHexCer 38:4;O3	Sphingolipids	Glycosphingolipids	SHexCer	7.64043	868.525	Pos	Tier 3	4.09326	0.8357	-0.25893	0.43242	0.792827	NoSig	NA	1.4182	0.50404	0.092963	0.981545	NoSig	NA	1.6782	0.74692	0.021304	0.609978	Sig	↑
Hex2Cer 43:2;O4	Sphingolipids	Neutral glycosphingolipids	Hex2Cer	13.8215	1016.73	Neg	Tier 3	1.82955	1.107	0.14666	0.29444	0.723491	NoSig	NA	1.0622	0.087036	0.73517	0.999325	NoSig	NA	1.2883	0.36551	0.022782	0.609978	Sig	↑
HexCer 36:1;O6	Sphingolipids	Neutral glycosphingolipids	HexCer	9.51833	792.584	Pos	Tier 3	0.890628	1.0818	0.11343	0.50041	0.832081	NoSig	NA	0.99594	-0.005872	0.97052	0.999325	NoSig	NA	0.79056	-0.33906	0.023403	0.609978	Sig	↓
Cer 34:1;O2	Sphingolipids	Ceramides	Cer	10.5762	538.521	Pos	Tier 3	3.36735	1.0515	0.072447	0.70094	0.918487	NoSig	NA	0.88406	-0.17779	0.15147	0.998251	NoSig	NA	0.80086	-0.32037	0.025059	0.609978	Sig	↓
HexCer 50:4;O2	Sphingolipids	Neutral glycosphingolipids	HexCer	18.1056	900.77	Pos	Tier 3	5.44797	1.5412	0.62405	0.14779	0.682092	NoSig	NA	1.0625	0.087427	0.57285	0.999325	NoSig	NA	1.2745	0.34999	0.025714	0.609978	Sig	↑
SM d14:0_21:1	Sphingolipids	Phosphosphingolipids	SM	10.0814	761.582	Neg	Tier 1	1.78576	1.0036	0.0052457	0.9766	0.991684	NoSig	NA	0.94679	-0.078888	0.50955	0.999325	NoSig	NA	0.89031	-0.16763	0.028478	0.624075	Sig	↓
ACer 72:2;O3	Sphingolipids	Ceramides	ACer	10.564	1081.06	Pos	Tier 3	2.19932	1.1192	0.16249	0.26198	0.700161	NoSig	NA	1.0751	0.10453	0.38027	0.998251	NoSig	NA	0.76963	-0.37777	0.029704	0.627054	Sig	↓
Cer 40:2;O3	Sphingolipids	Ceramides	Cer	12.9223	618.583	Pos	Tier 3	1.91949	0.92517	-0.11222	0.27494	0.710019	NoSig	NA	0.98917	-0.015715	0.86083	0.999325	NoSig	NA	0.85595	-0.2244	0.030363	0.629365	Sig	↓
SPBP 20:2;O4	Sphingolipids	Sphingoid bases	SPBP	3.38208	455.29	Pos	Tier 3	3.46479	1.0622	0.087003	0.6573	0.902954	NoSig	NA	0.82254	-0.28185	0.19894	0.998251	NoSig	NA	0.67842	-0.55976	0.033667	0.667826	Sig	↓
PE-Cer 37:0;O6	Sphingolipids	Phosphosphingolipids	CerPE	6.05138	767.556	Neg	Tier 3	0.624542	1.134	0.18147	0.20841	0.683011	NoSig	NA	1.0829	0.11486	0.23988	0.998251	NoSig	NA	1.3307	0.4122	0.034363	0.675806	Sig	↑
HexCer 43:4;O5	Sphingolipids	Neutral glycosphingolipids	HexCer	10.006	868.653	Pos	Tier 3	2.99661	1.1155	0.15767	0.30805	0.723491	NoSig	NA	0.96377	-0.053239	0.7355	0.999325	NoSig	NA	0.78171	-0.35529	0.039783	0.700904	Sig	↓
Cer 44:3;O5	Sphingolipids	Ceramides	Cer	10.3042	744.612	Pos	Tier 3	0.433745	0.85233	-0.23052	0.22321	0.690331	NoSig	NA	0.84923	-0.23577	0.1297	0.991106	NoSig	NA	0.7679	-0.38101	0.043004	0.700904	Sig	↓
HexCer 42:2;O2	Sphingolipids	Glycosphingolipids	HexCer	14.2047	832.665	Pos	Tier 3	1.74514	0.84304	-0.24632	0.28053	0.710019	NoSig	NA	0.83267	-0.26418	0.23799	0.998251	NoSig	NA	0.67486	-0.56734	0.04504	0.700904	Sig	↓
ACer 67:3;O5	Sphingolipids	Ceramides	ACer	18.9665	1080.95	Pos	Tier 3	0.196605	0.92832	-0.10731	0.59604	0.869131	NoSig	NA	0.86732	-0.20536	0.22529	0.998251	NoSig	NA	0.77097	-0.37525	0.046585	0.700904	Sig	↓
HexCer 46:6;O4	Sphingolipids	Neutral glycosphingolipids	HexCer	17.7155	890.673	Pos	Tier 3	1.09592	1.6787	0.74738	0.10379	0.661553	NoSig	NA	1.2012	0.26452	0.18279	0.998251	NoSig	NA	1.3031	0.3819	0.048281	0.700904	Sig	↑
SM 41:0;O2	Sphingolipids	Phosphosphingolipids	SM	6.86528	825.686	Pos	Tier 3	4.50482	0.79119	-0.33791	0.086238	0.619684	NoSig	NA	0.89252	-0.16404	0.49487	0.998251	NoSig	NA	1.3025	0.38131	0.049717	0.700904	Sig	↑
Cer 41:0;O3	Sphingolipids	Ceramides	Cer	16.8269	654.64	Pos	Tier 3	0.803203	0.61315	-0.70569	0.032273	0.501346	Sig	↓	0.64154	-0.64038	0.092993	0.981545	NoSig	NA	0.60909	-0.71528	0.018283	0.609978	Sig	↓
SM 53:2;O5	Sphingolipids	Phosphosphingolipids	SM	17.4839	1013.83	Neg	Tier 3	2.09393	0.7516	-0.41197	0.0057718	0.44269	Sig	↓	0.97639	-0.034476	0.7772	0.999325	NoSig	NA	0.79017	-0.33977	0.02969	0.627054	Sig	↓
SM 46:0;O5	Sphingolipids	Phosphosphingolipids	SM	17.5789	921.765	Pos	Tier 3	2.53378	1.3881	0.47316	0.0054209	0.439023	Sig	↑	1.0692	0.096509	0.48539	0.998251	NoSig	NA	1.1989	0.26165	0.057476	0.722514	NoSig	NA
Cer d17:2_20:3;O3	Sphingolipids	Ceramides	Cer	6.40476	632.493	Neg	Tier 1	6.79854	1.4001	0.48554	0.0011049	0.289604	Sig	↑	1.3647	0.44863	0.060099	0.973858	NoSig	NA	1.1621	0.21675	0.06093	0.738287	NoSig	NA
PI-Cer 46:1;O3	Sphingolipids	Phosphosphingolipids	IPC	17.7106	962.711	Neg	Tier 3	4.11842	0.8253	-0.27701	0.026667	0.485624	Sig	↓	0.87898	-0.1861	0.33798	0.998251	NoSig	NA	0.91046	-0.13534	0.099349	0.763843	NoSig	NA
HexCer d20:2_22:0;O2	Sphingolipids	Neutral glycosphingolipids	HexCer	14.1526	854.673	Neg	Tier 1	1.56785	0.74715	-0.42053	0.049451	0.538553	Sig	↓	0.80454	-0.31377	0.12494	0.991106	NoSig	NA	0.73839	-0.43754	0.10534	0.763849	NoSig	NA
HexCer 41:2;O5	Sphingolipids	Neutral glycosphingolipids	HexCer	12.2273	844.655	Pos	Tier 3	4.68205	0.594	-0.75146	0.015471	0.466777	Sig	↓	0.84201	-0.24809	0.30897	0.998251	NoSig	NA	0.74731	-0.42023	0.13385	0.771007	NoSig	NA
Hex2Cer 54:0;O6	Sphingolipids	Neutral glycosphingolipids	Hex2Cer	11.786	1230.92	Pos	Tier 3	3.14422	0.55098	-0.85992	0.034894	0.50298	Sig	↓	0.64187	-0.63964	0.051177	0.910625	NoSig	NA	0.69612	-0.5226	0.14273	0.781028	NoSig	NA
SM 50:0;O5	Sphingolipids	Phosphosphingolipids	SM	18.0008	999.808	Pos	Tier 3	0.400279	0.62167	-0.68578	0.013984	0.466777	Sig	↓	0.90381	-0.14591	0.46878	0.998251	NoSig	NA	0.84754	-0.23865	0.14644	0.787406	NoSig	NA
Hex2Cer 31:4;O2	Sphingolipids	Glycosphingolipids	Hex2Cer	7.75659	814.535	Pos	Tier 3	4.96603	0.56898	-0.81355	0.0089292	0.458064	Sig	↓	0.80648	-0.31029	0.17018	0.998251	NoSig	NA	0.79604	-0.32908	0.16151	0.802077	NoSig	NA
SHexCer 38:2;O2	Sphingolipids	Glycosphingolipids	SHexCer	4.47728	856.56	Pos	Tier 3	2.14259	1.3118	0.3915	0.044048	0.531117	Sig	↑	1.2495	0.32134	0.095375	0.985354	NoSig	NA	1.1318	0.17866	0.17485	0.8127	NoSig	NA
SM 47:4;O2	Sphingolipids	Phosphosphingolipids	SM	17.9336	901.718	Pos	Tier 3	4.8206	0.86606	-0.20746	0.035423	0.50298	Sig	↓	1.0177	0.025373	0.91175	0.999325	NoSig	NA	1.1358	0.18368	0.17602	0.8127	NoSig	NA
PE-Cer 37:2;O3	Sphingolipids	Phosphosphingolipids	CerPE	18.2375	717.559	Pos	Tier 3	6.84249	0.54869	-0.86593	0.04986	0.538628	Sig	↓	0.75963	-0.39663	0.22151	0.998251	NoSig	NA	0.68949	-0.53641	0.1766	0.8127	NoSig	NA
PI-Cer 40:3;O4	Sphingolipids	Phosphosphingolipids	IPC	9.34208	909.619	Pos	Tier 3	1.28423	0.74394	-0.42674	0.0012586	0.289604	Sig	↓	0.82056	-0.28532	0.15633	0.998251	NoSig	NA	0.85423	-0.2273	0.18907	0.831836	NoSig	NA
SM d14:0_28:2	Sphingolipids	Phosphosphingolipids	SM	13.8549	813.686	Pos	Tier 1	1.73286	0.69222	-0.5307	0.0030725	0.422717	Sig	↓	0.98214	-0.026	0.86231	0.999325	NoSig	NA	0.89649	-0.15765	0.21952	0.855677	NoSig	NA
Hex2Cer 35:5;O4	Sphingolipids	Neutral glycosphingolipids	Hex2Cer	10.2329	900.572	Pos	Tier 3	4.9913	0.74983	-0.41536	0.035497	0.50298	Sig	↓	0.95233	-0.070471	0.56633	0.999325	NoSig	NA	0.88305	-0.17943	0.22086	0.855677	NoSig	NA
SM 45:5;O2	Sphingolipids	Phosphosphingolipids	SM	10.2318	871.667	Pos	Tier 3	0.619788	0.56951	-0.8122	0.017962	0.466777	Sig	↓	0.79637	-0.3285	0.20192	0.998251	NoSig	NA	0.78034	-0.35783	0.26749	0.879863	NoSig	NA
HexCer 45:4;O5	Sphingolipids	Neutral glycosphingolipids	HexCer	12.6758	896.686	Pos	Tier 3	4.42123	0.73944	-0.4355	0.018113	0.466777	Sig	↓	1.0316	0.044843	0.77986	0.999325	NoSig	NA	1.15	0.20168	0.31194	0.880731	NoSig	NA
HexCer 34:0;O2	Sphingolipids	Glycosphingolipids	HexCer	12.1812	702.588	Pos	Tier 3	0.0641409	1.3028	0.38156	0.047061	0.533435	Sig	↑	1.1749	0.23253	0.085935	0.981545	NoSig	NA	1.1711	0.22788	0.34569	0.880731	NoSig	NA
MIPC 37:3;O3	Sphingolipids	Phosphosphingolipids	MIPC	3.53224	994.592	Neg	Tier 3	4.4536	1.4541	0.54016	0.0055331	0.439023	Sig	↑	1.1665	0.22221	0.45406	0.998251	NoSig	NA	1.2148	0.28077	0.37089	0.891047	NoSig	NA
Cer d17:2_19:3;O3	Sphingolipids	Ceramides	Cer	5.38981	618.477	Neg	Tier 1	6.4352	1.2707	0.34559	0.022768	0.472493	Sig	↑	1.3171	0.39738	0.25606	0.998251	NoSig	NA	1.1208	0.16457	0.3733	0.891047	NoSig	NA
HexCer 46:0;O3	Sphingolipids	Glycosphingolipids	HexCer	18.2962	886.775	Pos	Tier 3	4.96744	1.7901	0.84003	0.0020399	0.361062	Sig	↑	1.2349	0.3044	0.16518	0.998251	NoSig	NA	1.1345	0.18208	0.43928	0.892881	NoSig	NA
ACer 53:4;O6	Sphingolipids	Ceramides	ACer	10.1964	898.712	Pos	Tier 3	1.31663	0.67758	-0.56153	0.039324	0.511212	Sig	↓	0.76778	-0.38124	0.15499	0.998251	NoSig	NA	0.84385	-0.24494	0.44567	0.895926	NoSig	NA
ACer 58:6;O2	Sphingolipids	Ceramides	ACer	19.0422	878.801	Pos	Tier 3	5.18915	1.3032	0.38206	0.032387	0.501346	Sig	↑	1.0308	0.043784	0.80962	0.999325	NoSig	NA	1.1257	0.17076	0.45314	0.899633	NoSig	NA
SM 48:1;O5	Sphingolipids	Phosphosphingolipids	SM	17.6899	947.781	Pos	Tier 3	1.98886	0.76925	-0.37847	0.00013622	0.156721	Sig	↓	1.1561	0.20922	0.21617	0.998251	NoSig	NA	1.1047	0.14361	0.49577	0.916789	NoSig	NA
PI-Cer 48:2;O3	Sphingolipids	Phosphosphingolipids	IPC	18.0268	988.726	Neg	Tier 3	4.02027	0.85946	-0.21849	0.037183	0.503283	Sig	↓	0.94762	-0.077626	0.57964	0.999325	NoSig	NA	0.93418	-0.098223	0.51	0.918888	NoSig	NA
HexCer 40:5;O5	Sphingolipids	Neutral glycosphingolipids	HexCer	7.74576	824.591	Pos	Tier 3	3.27836	0.61223	-0.70785	0.0073644	0.457986	Sig	↓	0.73866	-0.43701	0.084643	0.981545	NoSig	NA	0.89746	-0.15608	0.5198	0.921073	NoSig	NA
MIPC 31:2;O6	Sphingolipids	Phosphosphingolipids	MIPC	7.28163	962.51	Pos	Tier 3	2.10816	0.66736	-0.58347	0.017688	0.466777	Sig	↓	0.98888	-0.016129	0.91953	0.999325	NoSig	NA	1.074	0.103	0.53807	0.924329	NoSig	NA
Hex2Cer 34:5;O5	Sphingolipids	Neutral glycosphingolipids	Hex2Cer	7.28132	924.532	Pos	Tier 3	3.53061	0.7178	-0.47834	0.027943	0.485624	Sig	↓	0.87645	-0.19025	0.27938	0.998251	NoSig	NA	0.9287	-0.10672	0.55549	0.928912	NoSig	NA
Hex2Cer 29:3;O4	Sphingolipids	Neutral glycosphingolipids	Hex2Cer	7.89775	820.509	Pos	Tier 3	4.25869	1.2274	0.29564	0.04786	0.534971	Sig	↑	0.97367	-0.038488	0.78714	0.999325	NoSig	NA	1.0358	0.050703	0.6641	0.960095	NoSig	NA
Hex2Cer 34:2;O4	Sphingolipids	Neutral glycosphingolipids	Hex2Cer	10.7964	890.586	Neg	Tier 3	1.51639	0.65693	-0.60619	0.0069151	0.455033	Sig	↓	0.99218	-0.011324	0.9646	0.999325	NoSig	NA	0.95247	-0.070251	0.69094	0.962292	NoSig	NA
Cer 43:0;O3	Sphingolipids	Ceramides	Cer	15.2052	682.674	Pos	Tier 3	4.90709	1.4786	0.56419	0.030731	0.491056	Sig	↑	1.0347	0.04917	0.75136	0.999325	NoSig	NA	1.0488	0.068681	0.76892	0.963012	NoSig	NA
SHexCer 39:0;O2	Sphingolipids	Glycosphingolipids	SHexCer	7.6259	874.607	Pos	Tier 3	2.29681	0.71368	-0.48664	0.017766	0.466777	Sig	↓	0.84116	-0.24954	0.18371	0.998251	NoSig	NA	1.036	0.05105	0.83001	0.968757	NoSig	NA
PI-Cer 39:1;O4	Sphingolipids	Phosphosphingolipids	IPC	7.81951	904.591	Pos	Tier 3	2.51814	0.69981	-0.51496	0.0049121	0.439023	Sig	↓	0.85778	-0.22132	0.19733	0.998251	NoSig	NA	1.0278	0.039601	0.87062	0.974832	NoSig	NA
MIPC 53:6;O3	Sphingolipids	Phosphosphingolipids	MIPC	8.08677	1231.83	Pos	Tier 3	1.40468	0.62061	-0.68825	0.044471	0.531117	Sig	↓	0.86357	-0.21162	0.34424	0.998251	NoSig	NA	1.0142	0.020279	0.93727	0.990268	NoSig	NA
HexCer 47:5;O5	Sphingolipids	Neutral glycosphingolipids	HexCer	12.6766	922.702	Pos	Tier 3	4.19879	0.73978	-0.43483	0.020289	0.466777	Sig	↓	0.98092	-0.027798	0.83985	0.999325	NoSig	NA	1.0077	0.011069	0.94997	0.990295	NoSig	NA
Cer 50:4;O5	Sphingolipids	Ceramides	Cer	15.2324	826.69	Pos	Tier 3	0.613412	1.2024	0.26588	0.099862	0.651305	NoSig	NA	1.1984	0.26107	0.023499	0.798794	Sig	↑	1.2748	0.35025	0.0037798	0.576903	Sig	↑
ACer 43:0;O4	Sphingolipids	Ceramides	ACer	11.6851	734.627	Pos	Tier 3	0.748976	0.79951	-0.32281	0.073262	0.585171	NoSig	NA	0.74842	-0.41807	0.0068061	0.664644	Sig	↓	0.74062	-0.4332	0.0073528	0.604243	Sig	↓
CerP 40:0;O2	Sphingolipids	Ceramides	Cer-1-P	15.1456	686.586	Pos	Tier 3	1.60889	1.0149	0.021401	0.87467	0.962635	NoSig	NA	0.77782	-0.3625	0.011984	0.69855	Sig	↓	0.7942	-0.33242	0.024696	0.609978	Sig	↓
CerP 43:5;O2	Sphingolipids	Ceramides	Cer-1-P	6.93882	718.558	Pos	Tier 3	6.24285	0.86786	-0.20447	0.16141	0.682897	NoSig	NA	0.86187	-0.21446	0.0018014	0.409897	Sig	↓	0.87006	-0.20081	0.030576	0.629365	Sig	↓
PI-Cer 50:5;O3	Sphingolipids	Phosphosphingolipids	IPC	17.2002	1010.71	Neg	Tier 3	3.47824	0.78072	-0.35713	0.070437	0.581864	NoSig	NA	0.74492	-0.42485	0.0090203	0.69855	Sig	↓	0.7865	-0.34649	0.038959	0.700904	Sig	↓
CerP 51:5;O2	Sphingolipids	Ceramides	Cer-1-P	11.9544	870.672	Pos	Tier 3	0.772695	0.88678	-0.17335	0.30564	0.723491	NoSig	NA	0.68562	-0.54451	0.020397	0.798794	Sig	↓	0.7733	-0.3709	0.093684	0.763843	NoSig	NA
PE-Cer 41:4;O6	Sphingolipids	Phosphosphingolipids	CerPE	9.19623	815.556	Neg	Tier 3	0.514351	0.8032	-0.31616	0.081894	0.613834	NoSig	NA	0.68894	-0.53755	0.0249	0.798794	Sig	↓	0.80584	-0.31144	0.11912	0.763849	NoSig	NA
Cer 42:2;O3	Sphingolipids	Ceramides	Cer	14.1385	646.614	Pos	Tier 3	1.20551	0.98584	-0.020576	0.9058	0.973091	NoSig	NA	0.82591	-0.27594	0.049453	0.910625	Sig	↓	0.87434	-0.19374	0.15026	0.787936	NoSig	NA
SHexCer 42:6;O2	Sphingolipids	Glycosphingolipids	SHexCer	12.5618	882.581	Pos	Tier 3	5.15896	0.90772	-0.13968	0.47843	0.812686	NoSig	NA	0.73757	-0.43914	0.047667	0.910625	Sig	↓	0.82857	-0.2713	0.16563	0.812611	NoSig	NA
PI-Cer 52:2;O5	Sphingolipids	Phosphosphingolipids	IPC	9.06611	1078.79	Pos	Tier 3	1.34257	0.74366	-0.42729	0.099237	0.651305	NoSig	NA	0.73186	-0.45036	0.032221	0.85219	Sig	↓	0.8668	-0.20623	0.21109	0.855677	NoSig	NA
HexCer 51:4;O5	Sphingolipids	Neutral glycosphingolipids	HexCer	18.8109	980.778	Pos	Tier 3	2.14336	0.88628	-0.17417	0.32059	0.728983	NoSig	NA	0.8198	-0.28666	0.017296	0.782475	Sig	↓	0.91043	-0.13538	0.25366	0.867268	NoSig	NA
SM d14:0_22:0	Sphingolipids	Phosphosphingolipids	SM	17.0753	733.625	Pos	Tier 1	4.3074	0.94673	-0.078971	0.35338	0.739646	NoSig	NA	1.1465	0.19722	0.038967	0.905688	Sig	↑	1.1227	0.16699	0.26227	0.879863	NoSig	NA
PE-Cer 40:6;O3	Sphingolipids	Phosphosphingolipids	CerPE	9.86741	749.524	Neg	Tier 3	0.659532	1.158	0.2117	0.23338	0.693616	NoSig	NA	0.90125	-0.15	0.044276	0.910625	Sig	↓	0.93433	-0.098002	0.28033	0.880731	NoSig	NA
SM 44:4;O3	Sphingolipids	Phosphosphingolipids	SM	16.7439	853.682	Pos	Tier 3	3.60395	0.781	-0.35661	0.054334	0.541223	NoSig	NA	0.7389	-0.43654	0.024132	0.798794	Sig	↓	0.87499	-0.19267	0.32102	0.880731	NoSig	NA
HexCer d14:2_30:2;O2	Sphingolipids	Neutral glycosphingolipids	HexCer	15.3087	834.68	Pos	Tier 2	2.33622	0.86843	-0.20352	0.21518	0.687679	NoSig	NA	0.8183	-0.2893	0.036654	0.889864	Sig	↓	0.92126	-0.11832	0.34544	0.880731	NoSig	NA
SHexCer 35:0;O6	Sphingolipids	Acidic glycosphingolipids	SHexCer	10.805	858.528	Neg	Tier 3	3.0947	0.92299	-0.11561	0.64571	0.898838	NoSig	NA	0.79494	-0.33107	0.021272	0.798794	Sig	↓	0.90876	-0.13803	0.41278	0.892805	NoSig	NA
Hex(2)-HexNAc-NeuGc-Cer 42:1;O2	Sphingolipids	Neutral glycosphingolipids	Hex2Cer	12.7297	1482.91	Neg	Tier 3	1.57287	0.92067	-0.11924	0.11717	0.669226	NoSig	NA	1.2245	0.29217	0.0099347	0.69855	Sig	↑	1.0345	0.048959	0.55813	0.930621	NoSig	NA
Cer d22:3_36:7;O3	Sphingolipids	Ceramides	Cer	16.1462	916.744	Neg	Tier 1	4.74508	1.164	0.21907	0.1695	0.682897	NoSig	NA	1.2252	0.29305	0.0011322	0.361832	Sig	↑	0.97352	-0.03871	0.67456	0.960095	NoSig	NA
Hex2Cer 54:1;O6	Sphingolipids	Neutral glycosphingolipids	Hex2Cer	12.7148	1206.92	Pos	Tier 3	1.95703	1.1261	0.17128	0.44011	0.79594	NoSig	NA	0.83318	-0.26331	0.0094431	0.69855	Sig	↓	0.95312	-0.069269	0.68253	0.962292	NoSig	NA
HexCer 39:4;O3	Sphingolipids	Glycosphingolipids	HexCer	10.1506	802.582	Pos	Tier 3	2.47309	0.7153	-0.48339	0.0063046	0.446896	Sig	↓	0.77857	-0.36109	0.028139	0.809894	Sig	↓	0.78988	-0.3403	0.022262	0.609978	Sig	↓
MIPC 50:0;O2	Sphingolipids	Phosphosphingolipids	MIPC	10.1263	1168.86	Pos	Tier 3	3.04576	0.76439	-0.38763	0.022438	0.472493	Sig	↓	0.82644	-0.27502	0.015507	0.782475	Sig	↓	0.84719	-0.23924	0.039412	0.700904	Sig	↓
HexCer 42:3;O5	Sphingolipids	Neutral glycosphingolipids	HexCer	10.9119	856.655	Pos	Tier 3	4.89687	0.76066	-0.39469	0.010299	0.466777	Sig	↓	0.81327	-0.29819	0.018687	0.798794	Sig	↓	0.852	-0.23108	0.062891	0.742114	NoSig	NA
Cer d17:3_36:7;O3	Sphingolipids	Ceramides	Cer	15.3314	846.661	Neg	Tier 1	0.4252	0.8044	-0.31402	0.0071895	0.457986	Sig	↓	0.87984	-0.18469	0.012051	0.69855	Sig	↓	0.85919	-0.21895	0.085334	0.763843	NoSig	NA
SM 43:4;O3	Sphingolipids	Phosphosphingolipids	SM	16.7438	839.667	Pos	Tier 3	4.03382	0.83184	-0.26561	0.040238	0.517249	Sig	↓	0.75486	-0.40571	0.0069154	0.664644	Sig	↓	0.82923	-0.27015	0.1253	0.763849	NoSig	NA
Hex2Cer 34:6;O5	Sphingolipids	Neutral glycosphingolipids	Hex2Cer	7.74743	900.533	Pos	Tier 3	1.32848	0.67437	-0.56839	0.0081909	0.458064	Sig	↓	0.78493	-0.34936	0.021774	0.798794	Sig	↓	0.89857	-0.15429	0.18661	0.825749	NoSig	NA
SM d14:2_22:2	Sphingolipids	Phosphosphingolipids	SM	6.44208	725.559	Pos	Tier 1	0.840731	0.7144	-0.48519	0.012534	0.466777	Sig	↓	0.80065	-0.32076	0.043008	0.910625	Sig	↓	0.82474	-0.27799	0.22389	0.855677	NoSig	NA
PI-Cer 38:2;O4	Sphingolipids	Phosphosphingolipids	IPC	8.33028	883.604	Pos	Tier 3	2.83628	0.78962	-0.34078	0.040543	0.518275	Sig	↓	0.73456	-0.44504	0.034136	0.88255	Sig	↓	0.84188	-0.24831	0.26828	0.879863	NoSig	NA
PI-Cer 36:5;O6	Sphingolipids	Phosphosphingolipids	IPC	6.92692	881.515	Pos	Tier 3	1.61555	0.75749	-0.4007	0.0036405	0.422717	Sig	↓	0.7576	-0.40049	0.0054789	0.630347	Sig	↓	0.96769	-0.04739	0.60497	0.943665	NoSig	NA
SHexCer 33:0;O6	Sphingolipids	Acidic glycosphingolipids	SHexCer	9.05391	830.496	Neg	Tier 3	2.66986	0.62951	-0.6677	0.02808	0.485624	Sig	↓	0.79427	-0.3323	0.046143	0.910625	Sig	↓	0.98547	-0.021109	0.89398	0.981193	NoSig	NA
ST 22:0;O2;S	Sterol Lipids	Sterol/Bile acid conjugates(In-silico)	Sulfate conjugates(In-silico)	1.09957	432.28	Pos	Tier 3	5.74537	1.1154	0.15762	0.35053	0.737941	NoSig	NA	1.1299	0.17623	0.42827	0.998251	NoSig	NA	1.1484	0.19964	0.019939	0.609978	Sig	↑
ST 30:1;O4;S	Sterol Lipids	Sterol/Bile acid conjugates(In-silico)	Sulfate conjugates(In-silico)	2.05053	574.378	Pos	Tier 3	1.20429	0.98832	-0.016947	0.93529	0.984498	NoSig	NA	0.87151	-0.19842	0.13775	0.998251	NoSig	NA	0.82718	-0.27372	0.040536	0.700904	Sig	↓
ST 30:0;O6;Hex	Sterol Lipids	Sterol/Bile acid conjugates(In-silico)	Hexose conjugates(In-silico)	1.67267	655.444	Pos	Tier 3	4.28881	1.2052	0.26929	0.3145	0.723491	NoSig	NA	1.0981	0.13503	0.26154	0.998251	NoSig	NA	0.8376	-0.25567	0.040689	0.700904	Sig	↓
ST 28:0;O8	Sterol Lipids	Sterols(In silico)	Sterols(In silico)	4.43767	515.358	Pos	Tier 3	0.124429	0.99308	-0.010017	0.96438	0.989738	NoSig	NA	0.87844	-0.18698	0.41119	0.998251	NoSig	NA	0.65123	-0.61875	0.044912	0.700904	Sig	↓
CE 32:7;O2	Sterol Lipids	Sterol esters	CE	17.249	867.727	Pos	Tier 3	5.54274	1.6952	0.76149	0.14961	0.682897	NoSig	NA	1.4034	0.48897	0.15766	0.998251	NoSig	NA	1.4005	0.48591	0.045449	0.700904	Sig	↑
CE 32:5;O2	Sterol Lipids	Sterol esters	CE	18.0144	871.759	Pos	Tier 3	5.60895	1.4219	0.50778	0.04156	0.522566	Sig	↑	1.217	0.28329	0.06962	0.981545	NoSig	NA	1.4653	0.55123	0.049553	0.700904	Sig	↑
CE 18:0	Sterol Lipids	Sterol esters	CE	19.2314	684.667	Pos	Tier 3	2.62063	0.73192	-0.45025	0.026831	0.485624	Sig	↓	0.82234	-0.28219	0.098954	0.988503	NoSig	NA	0.79547	-0.33011	0.050041	0.700904	NoSig	NA
ST 52:5;O7	Sterol Lipids	Sterols(In silico)	Sterols(In silico)	12.7817	805.637	Pos	Tier 3	3.44501	0.61775	-0.69491	0.036907	0.50298	Sig	↓	0.91479	-0.12848	0.5338	0.999325	NoSig	NA	0.73788	-0.43855	0.093123	0.763843	NoSig	NA
CE 33:6;O2	Sterol Lipids	Sterol esters	CE	17.8069	883.756	Pos	Tier 3	3.0405	1.7413	0.80017	0.012377	0.466777	Sig	↑	1.0359	0.050885	0.67315	0.999325	NoSig	NA	1.1972	0.25971	0.10023	0.763843	NoSig	NA
ST 54:4;O7	Sterol Lipids	Sterols(In silico)	Sterols(In silico)	15.3092	835.684	Pos	Tier 3	3.31188	0.75257	-0.41009	0.0148	0.466777	Sig	↓	0.81308	-0.29852	0.051228	0.910625	NoSig	NA	0.87617	-0.19072	0.11082	0.763849	NoSig	NA
CE 25:4	Sterol Lipids	Sterol esters	CE	19.0091	760.698	Pos	Tier 3	2.00225	0.70452	-0.50528	0.049619	0.538553	Sig	↓	0.89302	-0.16324	0.37828	0.998251	NoSig	NA	0.80797	-0.30762	0.11198	0.763849	NoSig	NA
ST 25:0;O6;Hex	Sterol Lipids	Sterol/Bile acid conjugates(In-silico)	Hexose conjugates(In-silico)	1.90789	620.404	Pos	Tier 3	6.61055	0.34539	-1.5337	0.043971	0.531117	Sig	↓	0.48975	-1.0299	0.094089	0.983912	NoSig	NA	0.5821	-0.78065	0.18102	0.814214	NoSig	NA
CE 26:3	Sterol Lipids	Sterol esters	CE	19.4001	776.73	Pos	Tier 3	2.89576	0.62712	-0.67319	0.019643	0.466777	Sig	↓	0.79419	-0.33245	0.18635	0.998251	NoSig	NA	0.83111	-0.26688	0.28903	0.880731	NoSig	NA
ST 54:2;O7	Sterol Lipids	Sterols(In silico)	Sterols(In silico)	13.4258	857.723	Pos	Tier 3	0.0221777	0.59822	-0.74126	0.026256	0.485624	Sig	↓	0.82276	-0.28146	0.29577	0.998251	NoSig	NA	0.81561	-0.29406	0.34154	0.880731	NoSig	NA
ST 31:6;O3	Sterol Lipids	Sterols(In silico)	Sterols(In silico)	5.28092	484.38	Pos	Tier 3	3.9713	0.81455	-0.29593	0.011401	0.466777	Sig	↓	0.98134	-0.027173	0.83309	0.999325	NoSig	NA	1.0464	0.065452	0.3723	0.891047	NoSig	NA
ST 26:0;O4;S	Sterol Lipids	Sterol/Bile acid conjugates(In-silico)	Sulfate conjugates(In-silico)	1.6141	520.33	Pos	Tier 3	0.13936	1.5975	0.67584	0.044996	0.531117	Sig	↑	1.2216	0.28882	0.24083	0.998251	NoSig	NA	1.1058	0.14513	0.37648	0.891249	NoSig	NA
CE 21:6	Sterol Lipids	Sterol esters	CE	18.4772	700.604	Pos	Tier 3	1.19695	0.60741	-0.71926	0.0043516	0.439023	Sig	↓	0.79347	-0.33376	0.087178	0.981545	NoSig	NA	0.85886	-0.2195	0.3815	0.892805	NoSig	NA
ST 26:0;O6;T	Sterol Lipids	Sterol/Bile acid conjugates(In-silico)	Taurine conjugates(In-silico)	1.54272	544.33	Pos	Tier 3	0.228028	1.378	0.46259	0.025089	0.485124	Sig	↑	1.0944	0.13008	0.27952	0.998251	NoSig	NA	1.1402	0.18924	0.39548	0.892805	NoSig	NA
ST 28:1;O;S	Sterol Lipids	Sterol/Bile acid conjugates(In-silico)	Sulfate conjugates(In-silico)	3.13665	498.364	Pos	Tier 3	6.52676	0.82109	-0.28439	0.048762	0.537201	Sig	↓	0.9368	-0.094187	0.64421	0.999325	NoSig	NA	0.96134	-0.056875	0.60473	0.943665	NoSig	NA
ST 53:3;O7	Sterol Lipids	Sterols(In silico)	Sterols(In silico)	11.2517	841.693	Pos	Tier 3	1.24779	0.72422	-0.4655	0.030019	0.485624	Sig	↓	0.95736	-0.062871	0.71157	0.999325	NoSig	NA	1.0456	0.064312	0.72454	0.963012	NoSig	NA
CE 26:5	Sterol Lipids	Sterol esters	CE	18.4807	772.698	Pos	Tier 3	1.51988	0.71128	-0.49152	0.0495	0.538553	Sig	↓	0.88488	-0.17645	0.43495	0.998251	NoSig	NA	0.9752	-0.036235	0.89829	0.981931	NoSig	NA
CE 28:3;O2	Sterol Lipids	Sterol esters	CE	17.8504	819.727	Pos	Tier 3	6.02648	2.2522	1.1713	0.13832	0.674684	NoSig	NA	1.3075	0.38683	0.019055	0.798794	Sig	↑	1.5446	0.62724	0.0048913	0.576903	Sig	↑
CE 30:5;O2	Sterol Lipids	Sterol esters	CE	17.4488	843.727	Pos	Tier 3	5.487	2.33	1.2203	0.082421	0.613834	NoSig	NA	1.3613	0.44495	0.011071	0.69855	Sig	↑	1.5016	0.58647	0.0090072	0.606664	Sig	↑
ST 24:5;O7	Sterol Lipids	Sterols/Bile acids(In-silico)	Sterols/C24 Bile acids(In-silico)	1.28767	415.212	Pos	Tier 3	0.171211	0.90152	-0.14956	0.17684	0.682897	NoSig	NA	0.7886	-0.34264	0.0022259	0.409897	Sig	↓	0.76119	-0.39366	0.084253	0.763843	NoSig	NA
Celastrol (plant metabolite)	Sterol Lipids	Sterol esters	CE	1.28938	473.265	Pos	Tier 1	3.17961	1.0206	0.029482	0.65592	0.902545	NoSig	NA	0.84747	-0.23876	0.022316	0.798794	Sig	↓	0.78567	-0.348	0.087759	0.763843	NoSig	NA
ST 32:6;O4	Sterol Lipids	Sterols(In silico)	Sterols(In silico)	4.24905	493.336	Neg	Tier 3	6.50561	1.3235	0.40439	0.07917	0.604401	NoSig	NA	1.5789	0.65893	0.036931	0.889864	Sig	↑	1.3182	0.39858	0.25747	0.875094	NoSig	NA
ST 29:4;O3;G	Sterol Lipids	Sterol/Bile acid conjugates(In-silico)	Glycine conjugates(In-silico)	3.71601	480.349	Pos	Tier 3	3.75991	1.1295	0.17564	0.27249	0.708786	NoSig	NA	1.2524	0.32469	0.01327	0.710099	Sig	↑	0.96852	-0.046151	0.67954	0.961637	NoSig	NA
CE 33:5;O2	Sterol Lipids	Sterol esters	CE	18.3026	885.773	Pos	Tier 3	4.03949	1.6352	0.70947	0.0083161	0.458064	Sig	↑	1.2161	0.28232	0.043726	0.910625	Sig	↑	1.4951	0.58029	0.0037383	0.576903	Sig	↑
CE 34:7;O2	Sterol Lipids	Sterol esters	CE	17.6088	895.759	Pos	Tier 3	5.31321	2.3661	1.2425	0.047894	0.534971	Sig	↑	1.432	0.51804	0.042738	0.910625	Sig	↑	1.5889	0.66805	0.077658	0.763843	NoSig	NA
CE 34:5;O2	Sterol Lipids	Sterol esters	CE	18.5892	899.79	Pos	Tier 3	5.37839	2.1421	1.099	0.01345	0.466777	Sig	↑	1.398	0.48341	0.036798	0.889864	Sig	↑	1.7115	0.77529	0.080962	0.763843	NoSig	NA
