# Supplementary material for: Differential effects of milk, yogurt, and cheese on energy homeostasis and brown adipose tissue phenotype in high-fat diet-induced obese mice
Source: Royal Society of Chemistry journal article supplement (doi:10.1039/d4fo02201g), 2024-01-01
Supplement: d4fo02201g3.xlsx [file d4fo02201g3.xlsx]

## Sheet: milk
Table S2- Applying lipid ontology (lion) enrichment to significantly altered lipids in dairy product intervention compared to hfd group
Term ID	Discription	Annotated	p-value	FDR q-value	ES	Regulated
LION:0080982	above average lateral diffusion	7	0.02458	0.0681	-0.538462	DOWN
LION:0080981	below average lateral diffusion	9	0.66712	0.736	-0.233333	DOWN
LION:0080979	high lateral diffusion	6	0.04514	0.105	-0.535519	DOWN
LION:0080978	average lateral diffusion	3	0.2863	0.405	0.526882	UP
LION:0080977	low lateral diffusion	4	0.88869	0.924	0.259459	UP
LION:0080976	very low lateral diffusion	6	0.40547	0.513	-0.344262	DOWN
LION:0080973	below average bilayer thickness	6	0.34297	0.465	-0.363388	DOWN
LION:0080972	very high bilayer thickness	9	0.19765	0.303	-0.35	DOWN
LION:0080970	average bilayer thickness	3	0.20231	0.303	-0.569892	DOWN
LION:0080969	low bilayer thickness	5	0.57249	0.646	-0.327174	DOWN
LION:0022230	C15:1	3	0.20231	0.303	0.569892	UP
LION:0022229	C15:0	5	0.00257	0.0138	0.75	UP
LION:0012441	N-acylsphingosines (ceramides) [SP0201]	5	0.92706	0.935	0.220652	UP
LION:0012086	endosome/lysosome	26	0.00032	0.0041	-0.427324	DOWN
LION:0012085	golgi apparatus	17	0.00024	0.0036	-0.516074	DOWN
LION:0012084	lipid droplet	55	0.01061	0.0367	0.253324	UP
LION:0012082	plasma membrane	29	0.0077	0.0312	-0.327155	DOWN
LION:0012081	mitochondrion	14	0.44569	0.557	0.228571	UP
LION:0012080	endoplasmic reticulum (ER)	39	0.55423	0.637	-0.136923	DOWN
LION:0012018	dihexosylceramides	7	0.03859	0.0965	-0.510989	DOWN
LION:0012017	hexosylceramides	9	0.09017	0.175	-0.405556	DOWN
LION:0012011	lipid storage	55	0.01061	0.0367	0.253324	UP
LION:0012010	membrane component	116	0.00941	0.0353	-0.239254	DOWN
LION:0012009	lipid-mediated signalling	47	0.00615	0.0288	0.279443	UP
LION:0002979	C26:0	3	0.35948	0.466	0.494624	UP
LION:0002977	fatty acid with 3-5 double bonds	23	0.02463	0.0681	0.319277	UP
LION:0002976	fatty acid with more than 3 double bonds	26	0.01125	0.0367	0.329637	UP
LION:0002974	fatty acid with 6 double bonds	3	0.13554	0.237	0.612903	UP
LION:0002973	fatty acid with 5 double bonds	7	0.08095	0.167	0.461538	UP
LION:0002972	fatty acid with 4 double bonds	5	0.6727	0.736	0.301087	UP
LION:0002971	fatty acid with 3 double bonds	11	0.10678	0.198	0.358529	UP
LION:0002970	fatty acid with 2 double bonds	17	0.0406	0.0991	0.341655	UP
LION:0002969	monounsaturated fatty acid	18	0.00262	0.0138	0.435673	UP
LION:0002968	saturated fatty acid	35	0.00014	0.00294	0.398701	UP
LION:0002967	polyunsaturated fatty acid	40	0.00093	0.00651	0.340101	UP
LION:0002966	fatty acid with less than 2 double bonds	46	1.9e-06	6.65e-05	0.43387	UP
LION:0002965	fatty acid with 26 carbons	5	0.55772	0.637	0.331522	UP
LION:0002963	fatty acid with 24 carbons	3	0.9282	0.935	-0.284946	DOWN
LION:0002961	fatty acid with 22 carbons	17	0.0004	0.0041	0.503078	UP
LION:0002959	fatty acid with 20 carbons	8	0.47392	0.576	0.285912	UP
LION:0002957	fatty acid with 18 carbons	21	0.00139	0.00912	0.428571	UP
LION:0002956	fatty acid with 17 carbons	5	0.14665	0.252	0.483696	UP
LION:0002955	fatty acid with 16 carbons	12	0.07108	0.149	0.368644	UP
LION:0002954	fatty acid with 15 carbons	8	0.00179	0.0111	0.631906	UP
LION:0002951	fatty acid with more than 24 carbons	7	0.2895	0.405	-0.357143	DOWN
LION:0002950	fatty acid with 22-24 carbons	21	0.00047	0.00411	0.458333	UP
LION:0002949	fatty acid with 19-21 carbons	11	0.23052	0.341	0.306946	UP
LION:0002948	fatty acid with 16-18 carbons	27	0.00038	0.0041	0.419753	UP
LION:0002947	fatty acid with 13-15 carbons	12	0.00021	0.0036	0.601695	UP
LION:0002945	fatty acid with more than 18 carbons	39	0.00584	0.0288	0.299487	UP
LION:0002936	C22:5	5	0.03281	0.0861	0.603261	UP
LION:0002935	C22:4	3	0.05573	0.12	0.704301	UP
LION:0002931	C22:0	11	0.00077	0.00577	0.582227	UP
LION:0002928	C20:3	3	0.27493	0.395	0.532258	UP
LION:0002924	C18:3	3	0.51089	0.61	0.435484	UP
LION:0002923	C18:2	12	0.01154	0.0367	0.457627	UP
LION:0002922	C18:1	10	0.00043	0.0041	0.626257	UP
LION:0002921	C18:0	7	0.34267	0.465	0.340659	UP
LION:0002882	C16:0	11	0.0475	0.108	0.405005	UP
LION:0001742	fatty acids and conjugates [FA01]	3	0.10919	0.198	0.634409	UP
LION:0001741	below average transition temperature	9	0.03619	0.0927	-0.461111	DOWN
LION:0001740	above average transition temperature	9	0.19765	0.303	-0.35	DOWN
LION:0001739	very high transition temperature	5	0.15208	0.253	-0.479348	DOWN
LION:0001738	high transition temperature	4	0.47757	0.576	0.391892	UP
LION:0001736	low transition temperature	7	0.04209	0.1	-0.505495	DOWN
LION:0000802	TG(58:5)	3	0.46797	0.576	0.451613	UP
LION:0000622	triacylglycerols [GL0301]	44	0.01442	0.0445	0.263636	UP
LION:0000608	1-alkyl,2-acylglycerols [GL0202]	14	0.16676	0.274	-0.297143	DOWN
LION:0000607	diacylglycerols [GL0201]	17	0.02751	0.0741	0.358413	UP
LION:0000604	triradylglycerols [GL03]	45	0.01098	0.0367	0.269444	UP
LION:0000603	diradylglycerols [GL02]	31	0.34558	0.465	0.176807	UP
LION:0000599	lysoglycerophospholipids	3	0.08784	0.174	0.655914	UP
LION:0000563	steryl esters [ST0102]	10	0.90427	0.931	-0.169832	DOWN
LION:0000467	contains ether-bond	10	0.08799	0.174	0.386592	UP
LION:0000466	positive intrinsic curvature	14	0.00059	0.00477	0.534286	UP
LION:0000465	neutral intrinsic curvature	23	0.09775	0.187	-0.264013	DOWN
LION:0000464	negative intrinsic curvature	47	0.02368	0.0681	0.244231	UP
LION:0000453	simple glc series [SP0501]	16	0.00241	0.0138	-0.459899	DOWN
LION:0000100	fatty acid with 18 carbons or less	37	4.1e-07	2.15e-05	0.492176	UP
LION:0000095	headgroup with positive charge / zwitter-ion	39	0.05613	0.12	-0.233846	DOWN
LION:0000094	headgroup with neutral charge	102	0.5851	0.654	-0.108857	DOWN
LION:0000093	headgroup with negative charge	33	0.3517	0.466	0.171911	UP
LION:0000088	sulfoglycosphingolipids (sulfatides) [SP0602]	3	0.25291	0.369	-0.543011	DOWN
LION:0000086	ceramide phosphoinositols [SP0303]	6	0.00803	0.0312	-0.639344	DOWN
LION:0000084	ceramide phosphocholines (sphingomyelins) [SP0301]	9	0.00791	0.0312	-0.538889	DOWN
LION:0000078	phosphosphingolipids [SP03]	16	4.8e-05	0.00126	-0.573338	DOWN
LION:0000070	1-alkyl,2-acylglycerophosphates [GP1002]	3	0.18393	0.293	0.580645	UP
LION:0000069	diacylglycerophosphates [GP1001]	3	0.15052	0.253	0.602151	UP
LION:0000059	diacylglycerophosphoglycerols [GP0401]	6	0.74695	0.799	0.259563	UP
LION:0000053	diacylglycerophosphoserines [GP0301]	4	0.75359	0.799	0.308108	UP
LION:0000047	diacylglycerophosphoinositols [GP0601]	3	0.79504	0.835	-0.333333	DOWN
LION:0000038	diacylglycerophosphoethanolamines [GP0201]	5	0.93547	0.935	-0.217391	DOWN
LION:0000035	monoalkylglycerophosphocholines [GP0106]	3	0.05284	0.118	0.709677	UP
LION:0000031	1-alkyl,2-acylglycerophosphocholines [GP0102]	5	0.35503	0.466	0.388043	UP
LION:0000030	diacylglycerophosphocholines [GP0101]	13	0.00659	0.0288	-0.465035	DOWN
LION:0000019	glycerophosphates [GP10]	6	0.01913	0.0574	0.590164	UP
LION:0000014	glycerophosphoglycerols [GP04]	7	0.55517	0.637	0.285714	UP
LION:0000013	glycerophosphoserines [GP03]	6	0.52936	0.625	0.311475	UP
LION:0000012	glycerophosphoinositols [GP06]	5	0.39455	0.505	0.376087	UP
LION:0000011	glycerophosphoethanolamines [GP02]	7	0.72973	0.79	0.247253	UP
LION:0000010	glycerophosphocholines [GP01]	22	0.16943	0.274	-0.242515	DOWN
LION:0000004	sphingolipids [SP]	40	1.8e-07	1.89e-05	-0.491275	DOWN
LION:0000003	glycerophospholipids [GP]	55	0.12627	0.225	0.183039	UP
LION:0000002	glycerolipids [GL]	76	0.00659	0.0288	0.245808	UP
LION:0000001	fatty acids [FA]	3	0.10919	0.198	0.634409	UP

## Sheet: Yogurt
Term ID	Discription	Annotated	p-value	FDR q-value	ES	Regulated
LION:0012011	lipid storage	31	5.4e-06	0.000208	0.520318	UP
LION:0012084	lipid droplet	31	5.4e-06	0.000208	0.520318	UP
LION:0000004	sphingolipids [SP]	26	1.9e-05	0.000488	-0.520638	DOWN
LION:0000002	glycerolipids [GL]	36	0.00011	0.002118	0.444444	UP
LION:0000622	triacylglycerols [GL0301]	26	0.0002	0.00308	0.466229	UP
LION:0000094	headgroup with neutral charge	46	0.00054	0.00693	0.38359	UP
LION:0000011	glycerophosphoethanolamines [GP02]	4	0.00089	0.00979	-0.875	DOWN
LION:0012010	membrane component	58	0.00111	0.010684	-0.363448	DOWN
LION:0000453	simple glc series [SP0501]	6	0.00589	0.050392	-0.666667	DOWN
LION:0000078	phosphosphingolipids [SP03]	10	0.00855	0.06202	-0.520408	DOWN
LION:0000086	ceramide phosphoinositols [SP0303]	4	0.00886	0.06202	-0.759615	DOWN
LION:0012081	mitochondrion	11	0.00993	0.063717	-0.492034	DOWN
LION:0000095	headgroup with positive charge / zwitter-ion	24	0.01107	0.065568	-0.363095	DOWN
LION:0012080	endoplasmic reticulum (ER)	28	0.02428	0.13354	-0.316071	DOWN
LION:0002923	C18:2	7	0.02916	0.149688	0.534653	UP
LION:0012446	Ceramide 1-phosphates [SP0205]	3	0.03977	0.187336	-0.742857	DOWN
LION:0012017	hexosylceramides	4	0.04136	0.187336	-0.653846	DOWN
LION:0002971	fatty acid with 3 double bonds	6	0.05596	0.239384	0.529412	UP
LION:0012082	plasma membrane	21	0.0672	0.272337	-0.305419	DOWN
LION:0002924	C18:3	4	0.07479	0.27423	0.605769	UP
LION:0002947	fatty acid with 13-15 carbons	4	0.07479	0.27423	0.605769	UP
LION:0000563	steryl esters [ST0102]	5	0.0866	0.3031	0.533981	UP
LION:0002957	fatty acid with 18 carbons	13	0.09856	0.329962	0.345749	UP
LION:0002948	fatty acid with 16-18 carbons	17	0.11747	0.360771	0.301875	UP
LION:0080981	below average lateral diffusion	6	0.11881	0.360771	-0.470588	DOWN
LION:0002930	C20:5	3	0.12216	0.360771	0.628571	UP
LION:0000465	neutral intrinsic curvature	14	0.12876	0.360771	-0.320669	DOWN
LION:0001740	above average transition temperature	5	0.13534	0.360771	-0.495146	DOWN
LION:0002969	monounsaturated fatty acid	11	0.13901	0.360771	0.349578	UP
LION:0000030	diacylglycerophosphocholines [GP0101]	9	0.14056	0.360771	-0.383838	DOWN
LION:0000100	fatty acid with 18 carbons or less	19	0.15333	0.380852	0.274985	UP
LION:0002953	fatty acid with 14 carbons	3	0.16123	0.38796	0.6	UP
LION:0002959	fatty acid with 20 carbons	6	0.16774	0.391393	0.441176	UP
LION:0002967	polyunsaturated fatty acid	23	0.17374	0.39347	0.249616	UP
LION:0002970	fatty acid with 2 double bonds	11	0.18399	0.404778	0.329897	UP
LION:0001737	average transition temperature	3	0.19172	0.410068	-0.580952	DOWN
LION:0012086	endosome/lysosome	15	0.19813	0.412325	-0.286022	DOWN
LION:0000063	monoacylglycerophosphoglycerols [GP0405]	3	0.20823	0.42194	0.571429	UP
LION:0000464	negative intrinsic curvature	21	0.21513	0.424744	-0.246305	DOWN
LION:0000467	contains ether-bond	5	0.22146	0.42631	-0.446602	DOWN
LION:0000084	ceramide phosphocholines (sphingomyelins) [SP0301]	4	0.22766	0.427557	-0.490385	DOWN
LION:0080976	very low lateral diffusion	5	0.25599	0.468697	-0.431068	DOWN
LION:0002955	fatty acid with 16 carbons	8	0.26174	0.468697	-0.35	DOWN
LION:0002976	fatty acid with more than 3 double bonds	17	0.2686	0.47005	0.252101	UP
LION:0000088	sulfoglycosphingolipids (sulfatides) [SP0602]	3	0.30277	0.518073	-0.52381	DOWN
LION:0002949	fatty acid with 19-21 carbons	7	0.3189	0.533811	0.349364	UP
LION:0000010	glycerophosphocholines [GP01]	14	0.36842	0.602864	-0.24924	DOWN
LION:0001739	very high transition temperature	3	0.39147	0.602864	-0.485714	DOWN
LION:0001741	below average transition temperature	3	0.39147	0.602864	0.485714	UP
LION:0080968	very low bilayer thickness	3	0.39147	0.602864	0.485714	UP
LION:0000047	diacylglycerophosphoinositols [GP0601]	3	0.41515	0.626795	-0.47619	DOWN
LION:0012009	lipid-mediated signalling	26	0.43508	0.644253	0.186679	UP
LION:0000077	ceramides [SP02]	7	0.4462	0.648253	-0.314003	DOWN
LION:0000607	diacylglycerols [GL0201]	7	0.46876	0.659903	0.308345	UP
LION:0002968	saturated fatty acid	8	0.48106	0.659903	0.29	UP
LION:0002900	C16:1	4	0.48939	0.659903	-0.394231	DOWN
LION:0002977	fatty acid with 3-5 double bonds	15	0.49236	0.659903	0.219355	UP
LION:0000599	lysoglycerophospholipids	6	0.5063	0.659903	0.323529	UP
LION:0002961	fatty acid with 22 carbons	6	0.5063	0.659903	0.323529	UP
LION:0000053	diacylglycerophosphoserines [GP0301]	3	0.51421	0.659903	0.438095	UP
LION:0002945	fatty acid with more than 18 carbons	19	0.52592	0.663866	0.193968	UP
LION:0080972	very high bilayer thickness	4	0.55283	0.67606	-0.375	DOWN
LION:0000603	diradylglycerols [GL02]	9	0.55314	0.67606	0.262626	UP
LION:0002966	fatty acid with less than 2 double bonds	18	0.61809	0.74364	0.188889	UP
LION:0002973	fatty acid with 5 double bonds	6	0.62834	0.744341	-0.294118	DOWN
LION:0002882	C16:0	4	0.68137	0.790434	-0.336538	DOWN
LION:0000003	glycerophospholipids [GP]	34	0.68778	0.790434	-0.139905	DOWN
LION:0002950	fatty acid with 22-24 carbons	8	0.70895	0.799773	0.24	UP
LION:0000014	glycerophosphoglycerols [GP04]	7	0.71668	0.799773	-0.250354	DOWN
LION:0000466	positive intrinsic curvature	10	0.73777	0.805897	0.210204	UP
LION:0000059	diacylglycerophosphoglycerols [GP0401]	4	0.7431	0.805897	-0.317308	DOWN
LION:0002972	fatty acid with 4 double bonds	4	0.8541	0.913412	0.278846	UP
LION:0002922	C18:1	6	0.8888	0.928651	-0.22549	DOWN
LION:0002965	fatty acid with 26 carbons	3	0.89247	0.928651	-0.304762	DOWN
LION:0002951	fatty acid with more than 24 carbons	5	0.90507	0.929205	-0.23301	DOWN
LION:0012441	N-acylsphingosines (ceramides) [SP0201]	4	0.94778	0.9478	0.240385	UP
LION:0000093	headgroup with negative charge	20	0.9478	0.9478	-0.120455	DOWN

## Sheet: Cheese
Term ID	Discription	Annotated	p-value	FDR q-value	ES	Regulated
LION:0002957	fatty acid with 18 carbons	15	0.0003	0.0273	0.546154	UP
LION:0012009	lipid-mediated signalling	44	0.0024	0.071	-0.323132	DOWN
LION:0000077	ceramides [SP02]	9	0.0033	0.071	-0.580065	DOWN
LION:0002923	C18:2	11	0.0035	0.071	0.529851	UP
LION:0000004	sphingolipids [SP]	28	0.0039	0.071	-0.360806	DOWN
LION:0000100	fatty acid with 18 carbons or less	20	0.0065	0.0986	0.394	UP
LION:0002970	fatty acid with 2 double bonds	13	0.0097	0.1109	0.45338	UP
LION:0000608	1-alkyl,2-acylglycerols [GL0202]	10	0.01	0.1109	-0.507407	DOWN
LION:0002967	polyunsaturated fatty acid	27	0.0129	0.1109	0.328625	UP
LION:0012011	lipid storage	37	0.0134	0.1109	0.293043	UP
LION:0012084	lipid droplet	37	0.0134	0.1109	0.293043	UP
LION:0000464	negative intrinsic curvature	43	0.0149	0.113	-0.277246	DOWN
LION:0002948	fatty acid with 16-18 carbons	18	0.0193	0.1238	0.368766	UP
LION:0000603	diradylglycerols [GL02]	25	0.0201	0.1238	-0.323333	DOWN
LION:0002971	fatty acid with 3 double bonds	8	0.0204	0.1238	0.518248	UP
LION:0002922	C18:1	4	0.0291	0.1655	0.673759	UP
LION:0002968	saturated fatty acid	13	0.0326	0.1745	0.399184	UP
LION:0002953	fatty acid with 14 carbons	3	0.0397	0.2007	0.739437	UP
LION:0000003	glycerophospholipids [GP]	40	0.0523	0.2402	0.244048	UP
LION:0080973	below average bilayer thickness	5	0.0528	0.2402	0.571429	UP
LION:0002966	fatty acid with less than 2 double bonds	26	0.0626	0.2457	0.275695	UP
LION:0001737	average transition temperature	3	0.0652	0.2457	0.690141	UP
LION:0080977	low lateral diffusion	3	0.0652	0.2457	0.690141	UP
LION:0012441	N-acylsphingosines (ceramides) [SP0201]	6	0.0669	0.2457	-0.509592	DOWN
LION:0012446	Ceramide 1-phosphates [SP0205]	3	0.0695	0.2457	-0.683099	DOWN
LION:0000622	triacylglycerols [GL0301]	32	0.0707	0.2457	0.25083	UP
LION:0000013	glycerophosphoserines [GP03]	10	0.0758	0.2457	0.4	UP
LION:0002949	fatty acid with 19-21 carbons	13	0.0769	0.2457	0.354895	UP
LION:0002929	C20:4	4	0.0783	0.2457	0.595745	UP
LION:0001740	above average transition temperature	4	0.0848	0.2572	-0.588652	DOWN
LION:0002959	fatty acid with 20 carbons	8	0.0945	0.2774	0.423358	UP
LION:0002972	fatty acid with 4 double bonds	7	0.1247	0.3441	0.429607	UP
LION:0002977	fatty acid with 3-5 double bonds	17	0.1248	0.3441	0.29182	UP
LION:0000466	positive intrinsic curvature	13	0.1355	0.3583	0.322261	UP
LION:0000563	steryl esters [ST0102]	5	0.1378	0.3583	0.492857	UP
LION:0080968	very low bilayer thickness	3	0.1669	0.4085	0.591549	UP
LION:0012085	golgi apparatus	8	0.1705	0.4085	-0.379562	DOWN
LION:0002973	fatty acid with 5 double bonds	4	0.1706	0.4085	-0.51773	DOWN
LION:0080970	average bilayer thickness	3	0.178	0.4153	-0.584507	DOWN
LION:0002924	C18:3	4	0.1927	0.4384	0.503546	UP
LION:0002945	fatty acid with more than 18 carbons	29	0.2131	0.473	0.215517	UP
LION:0012082	plasma membrane	27	0.2296	0.4764	-0.213434	DOWN
LION:0012010	membrane component	81	0.2321	0.4764	-0.167631	DOWN
LION:0000078	phosphosphingolipids [SP03]	7	0.2335	0.4764	-0.376812	DOWN
LION:0002976	fatty acid with more than 3 double bonds	18	0.2356	0.4764	0.249344	UP
LION:0000038	diacylglycerophosphoethanolamines [GP0201]	5	0.245	0.4847	0.435714	UP
LION:0000093	headgroup with negative charge	31	0.2721	0.5268	0.19468	UP
LION:0000607	diacylglycerols [GL0201]	15	0.2998	0.5609	-0.253846	DOWN
LION:0002969	monounsaturated fatty acid	16	0.3081	0.5609	0.244671	UP
LION:0002961	fatty acid with 22 carbons	9	0.3082	0.5609	0.313725	UP
LION:0001741	below average transition temperature	8	0.3468	0.6079	0.319343	UP
LION:0012080	endoplasmic reticulum (ER)	26	0.3474	0.6079	-0.193924	DOWN
LION:0080980	very high lateral diffusion	5	0.3545	0.6087	0.392857	UP
LION:0080974	above average bilayer thickness	6	0.3669	0.6183	0.357314	UP
LION:0000465	neutral intrinsic curvature	12	0.3751	0.6206	0.260652	UP
LION:0000084	ceramide phosphocholines (sphingomyelins) [SP0301]	3	0.4147	0.6739	-0.471831	DOWN
LION:0000053	diacylglycerophosphoserines [GP0301]	7	0.4479	0.7151	-0.311594	DOWN
LION:0002950	fatty acid with 22-24 carbons	16	0.5136	0.8058	0.205911	UP
LION:0000014	glycerophosphoglycerols [GP04]	8	0.5465	0.8429	0.270073	UP
LION:0080978	average lateral diffusion	3	0.6017	0.875	0.401408	UP
LION:0012017	hexosylceramides	8	0.6248	0.875	-0.25365	DOWN
LION:0000019	glycerophosphates [GP10]	4	0.6355	0.875	0.345745	UP
LION:0000059	diacylglycerophosphoglycerols [GP0401]	3	0.6403	0.875	0.387324	UP
LION:0000047	diacylglycerophosphoinositols [GP0601]	3	0.6493	0.875	0.384977	UP
LION:0001735	very low transition temperature	4	0.6592	0.875	0.338652	UP
LION:0002900	C16:1	4	0.6662	0.875	-0.336879	DOWN
LION:0002955	fatty acid with 16 carbons	6	0.6783	0.875	-0.276978	DOWN
LION:0000094	headgroup with neutral charge	72	0.6798	0.875	0.114155	UP
LION:0000001	fatty acids [FA]	3	0.6878	0.875	-0.370892	DOWN
LION:0001742	fatty acids and conjugates [FA01]	3	0.6878	0.875	-0.370892	DOWN
LION:0002939	C24:1	3	0.6878	0.875	-0.370892	DOWN
LION:0080971	high bilayer thickness	5	0.6923	0.875	-0.3	DOWN
LION:0012081	mitochondrion	14	0.7231	0.9014	0.182661	UP
LION:0001736	low transition temperature	4	0.751	0.9063	0.310284	UP
LION:0012086	endosome/lysosome	12	0.759	0.9063	0.18797	UP
LION:0000010	glycerophosphocholines [GP01]	6	0.7616	0.9063	0.256595	UP
LION:0000453	simple glc series [SP0501]	10	0.7669	0.9063	-0.203704	DOWN
LION:0000011	glycerophosphoethanolamines [GP02]	7	0.7769	0.9064	-0.23499	DOWN
LION:0080982	above average lateral diffusion	9	0.8273	0.9462	0.198529	UP
LION:0000599	lysoglycerophospholipids	4	0.8343	0.9462	0.281915	UP
LION:0002960	fatty acid with 21 carbons	5	0.8422	0.9462	0.257143	UP
LION:0080979	high lateral diffusion	5	0.8633	0.95	-0.25	DOWN
LION:0000095	headgroup with positive charge / zwitter-ion	18	0.8665	0.95	-0.14042	DOWN
LION:0000467	contains ether-bond	8	0.9195	0.9872	0.184307	UP
LION:0000060	1-alkyl,2-acylglycerophosphoglycerols [GP0402]	3	0.9278	0.9872	0.284038	UP
LION:0002963	fatty acid with 24 carbons	7	0.9529	0.9872	-0.181159	DOWN
LION:0000030	diacylglycerophosphocholines [GP0101]	3	0.9734	0.9872	0.251174	UP
LION:0000012	glycerophosphoinositols [GP06]	4	0.9761	0.9872	0.216312	UP
LION:0022262	C21:1	3	0.9796	0.9872	-0.244131	DOWN
LION:0002882	C16:0	3	0.9862	0.9872	0.234742	UP
LION:0000002	glycerolipids [GL]	59	0.9872	0.9872	-0.0707529	DOWN
